# Supplementary material for: Engineering hydrophobic covalent organic frameworks for electroreduction of nitrate to ammonia
Source: Royal Society of Chemistry journal article supplement (doi:10.1039/d6sc01645f), 2026-04-29
Supplement: d6sc01645f1.pdf [file d6sc01645f1.pdf]

## **Engineering Hydrophobic Covalent Organic Frameworks for Electroreduction of Nitrate to Ammonia**

Fuzhen Li,<sup>a</sup> Huan Lin,<sup>c</sup> Chunying Chen,<sup>c</sup> Li-lin Tan,<sup>b</sup> Dawei Wang,<sup>c</sup> Cunyuan Zhao,<sup>c</sup> Li Zhang<sup>\*c</sup>,

Cheng-Yong Su<sup>c</sup>

<sup>a</sup>School of Chemical Engineering and Technology, Sun Yat-sen University, Zhuhai 519082, China

<sup>b</sup>Shantou Engineering Technology Research Center for Green and Precise Manufacturing of High-value  
Chemicals, Chemistry and Chemical Engineering Guangdong Laboratory, Shantou 515031, China

<sup>c</sup>Lehn Institute of Functional Materials, School of Chemistry, Sun Yat-Sen University, Guangzhou  
510006, China. E-mail: zhli99@mail.sysu.edu.cn

## Contents

|                                                                                                |    |
|------------------------------------------------------------------------------------------------|----|
| 1. General information .....                                                                   | 1  |
| 2. Comparison of electrocatalytic NO <sub>3</sub> RR performances of different materials ..... | 3  |
| 3. Synthesis and characterizations of PCOFs .....                                              | 4  |
| 4. Electrocatalytic performances .....                                                         | 43 |
| References.....                                                                                | 57 |

## Captions for Figures and Tables

**Figure S1.** Schematic illustration of the synthesis of NPBPR.

**Figure S2.**  $^1\text{H}$  NMR spectrum of NPBPR in  $\text{CDCl}_3$ .

**Figure S3.**  $^1\text{H}$  NMR spectrum of EDAPP in  $\text{DMSO-}d_6$ .

**Figure S4.**  $^1\text{H}$  NMR spectrum of Pd-DAPP in  $\text{DMSO-}d_6$ .

**Figure S5.**  $^1\text{H}$  NMR spectrum of Pd-EDAPP in  $\text{DMSO-}d_6$ .

**Figure S6.** Schematic illustration of the synthesis of Pd-DAPP, Pd-EDAPP and EDAPP.

**Figure S7.** Schematic illustration of the synthesis of  $\text{Cu}_3(\text{PyCA})_3$ .

**Figure S8.** Photograph of the as-synthesized  $\text{Cu}_3(\text{PyCA})_3$  before sonication (a). Powder X-ray diffraction (PXRD) pattern of as-synthesized  $\text{Cu}_3(\text{PyCA})_3$  (b) and the along with simulated pattern from CCDC 2026064.

**Figure S9.** Schematic illustration of the synthesis of Pd-PCOF-1( $\text{Cu}_3$ ).

**Figure S10.** Schematic illustration of the synthesis of Pd-PCOF-2( $\text{Cu}_3$ ).

**Figure S11.** Schematic illustration of the synthesis of PCOF-2( $\text{Cu}_3$ ).

**Figure S12.** PXRD patterns of Pd-PCOF-1( $\text{Cu}_3$ ) with the experimental profiles, Pawley refined, difference curve, and simulated profiles of AA, AB, and ABC models.

**Figure S13.** ABC stacking model of Pd-PCOF-1( $\text{Cu}_3$ ) viewed from  $c$  axis. The dark green, orange, dark blue and white spheres refer to palladium, copper, nitrogen and hydrogen, respectively.

**Figure S14.** PXRD patterns of Pd-PCOF-1( $\text{Cu}_3$ ),  $\text{Cu}_3(\text{PyCA})_3$  and Pd-DAPP.

**Figure S15.** PXRD patterns of Pd-PCOF-2( $\text{Cu}_3$ ),  $\text{Cu}_3(\text{PyCA})_3$  and Pd-EDAPP.

**Figure S16.** PXRD patterns of PCOF-2( $\text{Cu}_3$ ),  $\text{Cu}_3(\text{PyCA})_3$  and EDAPP.

**Figure S17.** PXRD patterns of Pd-PCOF-2( $\text{Cu}_3$ ) with the experimental profiles, Pawley refined, difference curve, and simulated profiles of AA, AB, and ABC models.

**Figure 18.** ABC stacking model of Pd-PCOF-2( $\text{Cu}_3$ ) viewed from  $c$  axis. The dark green, orange, dark blue, red and white spheres refer to palladium, copper, nitrogen, oxygen and hydrogen, respectively.

**Figure S19.** PXRD patterns of PCOF-2( $\text{Cu}_3$ ) with the experimental profiles, Pawley refined, difference curve, and simulated profiles of AA, AB, and ABC models.

**Figure 20.** ABC stacking model of PCOF-2(Cu<sub>3</sub>) viewed from *c* axis. The orange, dark blue, red and white spheres refer to copper, nitrogen, oxygen and hydrogen, respectively.

**Figure S21.** SEM images of Pd-PCOF-1(Cu<sub>3</sub>).

**Figure S22.** SEM images of Pd-PCOF-2(Cu<sub>3</sub>).

**Figure S23.** SEM images of PCOF-2(Cu<sub>3</sub>).

**Figure S24.** FT-IR spectra of Pd-PCOF-1(Cu<sub>3</sub>), Cu<sub>3</sub>(PyCA)<sub>3</sub> and Pd-DAPP.

**Figure S25.** FT-IR spectra of Pd-PCOF-2(Cu<sub>3</sub>), Cu<sub>3</sub>(PyCA)<sub>3</sub> and Pd-EDAPP.

**Figure S26.** FT-IR spectra of PCOF-2(Cu<sub>3</sub>), Cu<sub>3</sub>(PyCA)<sub>3</sub> and EDAPP.

**Figure S27.** Pore size distribution profiles of Pd-PCOF-1(Cu<sub>3</sub>) (a), Pd-PCOF-2(Cu<sub>3</sub>) (b) and PCOF-2(Cu<sub>3</sub>) (c) calculated by Nonlocal Density Functional Theory (NLDFT) modeling based on N<sub>2</sub> adsorption data.

**Figure S28.** Survey scan XPS profiles of Cu<sub>3</sub>(PyCA)<sub>3</sub> (a), Pd-EDAPP (b), Pd-PCOF-1(Cu<sub>3</sub>) (c), Pd-PCOF-2(Cu<sub>3</sub>) (d) and PCOF-2(Cu<sub>3</sub>) (e).

**Figure S29.** High-resolution Cu 2*p* XPS profiles of Cu<sub>3</sub>(PyCA)<sub>3</sub> (a), Pd-PCOF-1(Cu<sub>3</sub>) (b), Pd-PCOF-2(Cu<sub>3</sub>) (c) and PCOF-2(Cu<sub>3</sub>) (d).

**Figure S30.** High-resolution Pd 3*d* XPS profiles of Pd-EDAPP(a), Pd-PCOF-1(Cu<sub>3</sub>) (b) and Pd-PCOF-2(Cu<sub>3</sub>) (c).

**Figure S31.** TGA curves of Pd-PCOF-1(Cu<sub>3</sub>) (a), Pd-PCOF-2(Cu<sub>3</sub>) (b) and PCOF-2(Cu<sub>3</sub>) (c) under N<sub>2</sub> atmosphere.

**Figure S32.** PXRD patterns of Pd-PCOF-2(Cu<sub>3</sub>) after treatment with various solvents for 24 h.

**Figure S33.** PXRD patterns of PCOF-2(Cu<sub>3</sub>) after treatment with various solvents for 24 h.

**Figure S34.** PXRD patterns of Pd-PCOF-1(Cu<sub>3</sub>) after treatment with various solvents for 24 h.

**Figure S35.** Three-electrode H-type electrolytic cell for NO<sub>3</sub>RR.

**Figure S36.** UV-vis absorption spectra of a series of standard KNO<sub>2</sub> solutions (a) and corresponding calibration curve used for the calculation of NO<sub>2</sub><sup>-</sup> concentration (b). The inset is the photograph of the KNO<sub>2</sub> solution after chromogenic reaction.

**Figure S37.** UV-vis absorption spectra of a series of standard NH<sub>4</sub>Cl solutions (a) and corresponding calibration curve used for the calculation of NH<sub>3</sub> concentration (b). The inset is the

photograph of the  $\text{NH}_4\text{Cl}$  solution after chromogenic reaction.

**Figure S38.**  $^1\text{H}$  NMR spectra of  $^{14}\text{NH}_4^+$  ions at different concentrations with 2 mM maleic acid as internal standard (a) and corresponding calibration curve used for the calculation of  $^{14}\text{NH}_4^+$  concentration (b). The inset is the chemical construction of maleic acid.

**Figure S39.**  $^1\text{H}$  NMR spectra of  $^{15}\text{NH}_4^+$  ions at different concentrations with 2 mM maleic acid as internal standard (a) and corresponding calibration curve used for the calculation of  $^{15}\text{NH}_4^+$  concentration (b).

**Figure S40.** Chronoamperometry curve of Pd-PCOF-1( $\text{Cu}_3$ ) for  $\text{NO}_3\text{RR}$  at different applied potentials (a). UV-vis absorption spectra of  $\text{NO}_2^-$  after chromogenic reaction (b).

**Figure S41.** Chronoamperometry curve of Pd-PCOF-2( $\text{Cu}_3$ ) for  $\text{NO}_3\text{RR}$  at different applied potentials (a). UV-vis absorption spectra of  $\text{NO}_2^-$  after chromogenic reaction (b).

**Figure S42.** Chronoamperometry curve of PCOF-2( $\text{Cu}_3$ ) for  $\text{NO}_3\text{RR}$  at different applied potentials (a). UV-vis absorption spectra of  $\text{NO}_2^-$  after chromogenic reaction (b).

**Figure S43.** The current density curve of Pd-PCOF-2( $\text{Cu}_3$ ) for continuous cyclic electrolysis at -0.9 V vs. RHE.

**Figure S44.** PXRD patterns of Pd-PCOF-2( $\text{Cu}_3$ ) before and after electrocatalysis over 10 consecutive cycles.

**Figure S45.** LSV curve at a scan rate of  $10 \text{ mV s}^{-1}$  (a) and chronoamperometry curve at -0.9 V vs. RHE (b) of Pd-PCOF-2( $\text{Cu}_3$ ) in 1 M KOH with 0.082 M  $\text{K}^{15}\text{NO}_3$ . The  $\text{NH}_3$  FE of Pd-PCOF-2( $\text{Cu}_3$ ) after electrolysis using  $^{14}\text{NO}_3^-$  or  $^{15}\text{NO}_3^-$  as nitrogen resources at -0.9 V vs. RHE (c).

**Figure S46.** Nyquist plots of Pd-PCOF-1( $\text{Cu}_3$ ), Pd-PCOF-2( $\text{Cu}_3$ ) and PCOF-2( $\text{Cu}_3$ ) in 1 M KOH and containing 0.1 M  $\text{KNO}_3$ .

**Figure S47.** CV curves of Pd-PCOF-1( $\text{Cu}_3$ ) (a), Pd-PCOF-2( $\text{Cu}_3$ ) (b) and PCOF-2( $\text{Cu}_3$ ) (c) at different scan rates. CV current density versus scan rate (the liner slope is equivalent to the  $C_{dl}$ ) (d). The ECSA comparison of Pd-PCOF-1( $\text{Cu}_3$ ), Pd-PCOF-2( $\text{Cu}_3$ ) and PCOF-2( $\text{Cu}_3$ ) (e).

**Figure S48.** The integrated area of  $^*\text{H}_{ads}$  from the peak of the CV curves over Pd-PCOF-1( $\text{Cu}_3$ ) (a), Pd-PCOF-2( $\text{Cu}_3$ ) (b) and PCOF-2( $\text{Cu}_3$ ) in 1 M KOH.

**Figure S49.** LSV curve at a scan rate of  $10 \text{ mV s}^{-1}$  (a) and chronoamperometry curve at different

applied potentials (b) of  $\text{Cu}_3(\text{PyCA})_3$  for  $\text{NO}_3\text{RR}$ . UV-vis absorption spectra of  $\text{NO}_2^-$  after chromogenic reaction (c).  $\text{NH}_3$ ,  $\text{NO}_2^-$  and  $\text{H}_2$  FEs of  $\text{Cu}_3(\text{PyCA})_3$  at different applied potentials (d).

**Figure S50.** LSV curve at a scan rate of  $10 \text{ mV s}^{-1}$  (a) and chronoamperometry curve at different applied potentials (b) of Pd-EDAPP for  $\text{NO}_3\text{RR}$ . UV-vis absorption spectra of  $\text{NH}_4^+$  (c) and  $\text{NO}_2^-$  (d) after chromogenic reaction.  $\text{NH}_3$ ,  $\text{NO}_2^-$  and  $\text{H}_2$  FEs of Pd-EDAPP at different applied potentials (e).

**Figure S51.** LSV curve at a scan rate of  $10 \text{ mV s}^{-1}$  (a) and chronoamperometry curve at different applied potentials (b) of  $\text{Cu}_3(\text{PyCA})_3$  for  $\text{NO}_2\text{RR}$ .  $\text{NH}_3$  and  $\text{H}_2$  FEs of  $\text{Cu}_3(\text{PyCA})_3$  at different applied potentials (c).

**Figure S52.** LSV curve at a scan rate of  $10 \text{ mV s}^{-1}$  (a) and chronoamperometry curve at different applied potentials (b) of Pd-EDAPP for  $\text{NO}_2\text{RR}$ . UV-vis absorption spectra of  $\text{NH}_4^+$  (c) after chromogenic reaction.  $\text{NH}_3$  and  $\text{H}_2$  FEs of Pd-EDAPP at different applied potentials (d).

**Figure S53.** LSV curve at a scan rate of  $10 \text{ mV s}^{-1}$  of Pd-EDAPP for  $\text{NO}_2\text{RR}$  and  $\text{NO}_3\text{RR}$  (a). The Tafel plots of Pd-EDAPP for  $\text{NO}_2\text{RR}$  and  $\text{NO}_3\text{RR}$  (b). The generation rate of  $\text{NH}_3$  in Pd-EDAPP-catalyzed  $\text{NO}_3\text{RR}$  and  $\text{NO}_2\text{RR}$  at different applied potentials (c).

**Figure S54.** LSV curve at a scan rate of  $10 \text{ mV s}^{-1}$  of Pd-EDAPP and  $\text{Cu}_3(\text{PyCA})_3$  for  $\text{NO}_2\text{RR}$  and  $\text{NO}_3\text{RR}$  (a). The  $\text{NH}_3$  yield rate of Pd-EDAPP and  $\text{Cu}_3(\text{PyCA})_3$  for  $\text{NO}_2\text{RR}$  at different applied potentials (b).

**Figure S55.** The integrated area of  $^*\text{H}_{\text{ads}}$  from the peak of the CV curves over Pd-EDAPP in 1 M KOH (a) and containing 0.1 M  $\text{KNO}_3$  (b) or 0.1 M  $\text{KNO}_2$  (c).

**Figure S56.** UV-vis absorption spectra of  $\text{NO}_2^-$  after chromogenic reaction for Zn- $\text{NO}_3^-$  battery.

**Table S1.** Comparison of  $\text{NH}_3$  yield rate and FE of Pd-PCOF-2( $\text{Cu}_3$ ) with reported COF and MOF-based electrocatalysts.

**Table S2.** Fractional atomic coordinates for Pd-PCOF-1( $\text{Cu}_3$ )-AA.

**Table S3.** Fractional atomic coordinates for Pd-PCOF-1( $\text{Cu}_3$ )-AB.

**Table S4.** Fractional atomic coordinates for Pd-PCOF-1( $\text{Cu}_3$ )-ABC.

**Table S5.** Fractional atomic coordinates for Pd-PCOF-2( $\text{Cu}_3$ )-AA.

**Table S6.** Fractional atomic coordinates for Pd-PCOF-2( $\text{Cu}_3$ )-AB.

**Table S7.** Fractional atomic coordinates for Pd-PCOF-2( $\text{Cu}_3$ )-ABC.

**Table S8.** Fractional atomic coordinates for PCOF-2(Cu<sub>3</sub>)-AA.

**Table S9.** Fractional atomic coordinates for PCOF-2(Cu<sub>3</sub>)-AB.

**Table S10.** Fractional atomic coordinates for PCOF-2(Cu<sub>3</sub>)-ABC.

## 1. General information

All reagents and materials were commercially purchased and directly used without further purification. 1H-pyrazole-4-carbaldehyde, cupric nitrate trihydrate ( $\text{Cu}(\text{NO}_3)_2 \cdot 3\text{H}_2\text{O}$ ), 4-nitrobenzaldehyde, propionic acid, stannous chloride dihydrate ( $\text{SnCl}_2 \cdot 2\text{H}_2\text{O}$ ), sodium citrate and salicylic acid were purchased from Shanghai Aladdin Biochemical Technology Co., Ltd. *N,N*-dimethylformamide, ethanol, triethylamine, methanol, tetrahydrofuran, ammonia water and ammonium chloride were obtained from Shanghai Titan Scientific Co., Ltd. Pyrrole, dimethyl sulfoxide- $d_6$ , chloroform- $d$ , phosphoric acid (85%) and sodium nitroferricyanide dihydrate were purchased from Annaiji Chemical Co., Ltd. Trifluoroacetic acid, *N*-(1-naphthyl) ethyldiamine dihydrochloride and sodium hypochlorite (0.1 M) were purchased from Shanghai Macklin Biochemical Co., Ltd. Benzaldehyde, 4-ethoxybenzaldehyde and ammonium chloride- $^{15}\text{N}$  were obtained from Bide Pharmatech Co., Ltd. Dichloromethane and petroleum ether (60-90 °C) were purchased from Shanghai wohua-chemical Co., Ltd. *o*-Dichlorobenzene and *n*-butanol were obtained from J&K Scientific Co., Ltd. Potassium nitrate and concentrated hydrochloric acid were purchased from Guangzhou Chemical Reagent Factory. Acetone was obtained from Xilong scientific Co., Ltd. Palladium chloride ( $\text{PdCl}_2$ ) was purchased from Kunming Boren Precious Metals Co.Ltd. Potassium hydroxide was obtained from Meryer (Shanghai) Chemical Technology Co., Ltd. Potassium nitrate- $\text{N}^{15}$  was purchased from Wuhan Isotope Technology Co., Ltd. *p*-aminobenzene sulfonamide was obtained from Shanghai ACMEC Biochemical Co., Ltd.

Powder X-ray diffraction (PXRD) patterns of the samples are carried out on a Rigaku Smart Lab diffractometer (Bragg-Brentano geometry, Cu-K $\alpha$  radiation,  $\lambda = 1.54056 \text{ \AA}$ ), the detecting angles started from  $2\theta = 2.0^\circ$  to  $2\theta = 40.0^\circ$ , with  $0.02^\circ$  increment and a scan rate of  $2.0^\circ/\text{min}$  or  $10.0^\circ/\text{min}$ . Scanning electron microscope (SEM) and energy-dispersive X-ray spectroscopy images were recorded on a Hitachi S4800 with an accelerating voltage of 10.0 kV. Transmission electron microscope (TEM) images were obtained with FEI Tecnai G2 spirit (120 kV). X-ray photoelectron spectroscopy (XPS) measurement was performed on a ULVAC PHI Quantera microprobe. Fourier-transform infrared (FT-IR) spectra were recorded by PerkinElmer Frontier spectrometer with Attenuated Total Reflectance (ATR) mode. The spectra are collected at  $1 \text{ cm}^{-1}$

resolution over 16 scans. Solid state  $^{13}\text{C}$  cross-polarization magic angle spinning nuclear magnetic resonance spectrum ( $^{13}\text{C}$  CP-MAS NMR) was measured on Bruker Avance Neo 600. Thermogravimetric analysis (TGA) was conducted on Netzsch TGA209F1 Thermogravimetric Analyzer and the samples were heated at a rate of  $10.0\text{ }^{\circ}\text{C}\cdot\text{min}^{-1}$  from  $40.0\text{ }^{\circ}\text{C}$  to  $800.0\text{ }^{\circ}\text{C}$  under the protection of nitrogen. Nuclear magnetic resonance ( $^1\text{H}$  NMR) spectra were performed by Bruker Avance III 400 (400 MHz) NMR spectrometer at room temperature. Ultraviolet and visible (UV-vis) absorption spectra were carried out on SHIMADZU UV-3600. Nitrogen sorption isotherms were measured with BSD-660M A6B3M physical adsorption analyzer (Beishide Instrument Technology) at 77 K and samples were typically heated at  $120\text{ }^{\circ}\text{C}$  under vacuum for 12 h before test. The surface areas of samples were evaluated according to Brunauer-Emmett-Teller (BET) theory, the pore size distribution (PSD) was calculated by Nonlocal Density Functional Theory (NLDFT) modeling based on  $\text{N}_2$  adsorption data. The static water contact angles were measured on OCA50 of Dataphysics Instrument GmbH.

## 2. Comparison of electrocatalytic NO<sub>3</sub>RR performances of different materials

**Table S1.** Comparison of NH<sub>3</sub> yield rate and FE of Pd-PCOF-2(Cu<sub>3</sub>) with reported COF and MOF-based electrocatalysts.

| Catalyst                                 | Electrolyte                                                                  | Potential<br>(V vs. RHE) | FE<br>(%) | NH <sub>3</sub> yeild<br>(mg h <sup>-1</sup> cm <sup>-2</sup> ) | Ref. |
|------------------------------------------|------------------------------------------------------------------------------|--------------------------|-----------|-----------------------------------------------------------------|------|
| Pd-PCOF-2(Cu <sub>3</sub> )              | 1 M KOH + 0.1 M KNO <sub>3</sub>                                             | -1.0                     | 94.70     | 13.72                                                           | This |
|                                          |                                                                              | -1.1                     | 92.83     | 15.09                                                           | work |
| NiPr-TPA-COF                             | 0.5 M K <sub>2</sub> SO <sub>4</sub> + 0.1 M KNO <sub>3</sub>                | -0.766                   | 80        | 2.5                                                             | [1]  |
| COF-366-Fe                               | 0.5 M K <sub>2</sub> SO <sub>4</sub> + 0.1 M KNO <sub>3</sub>                | -1.05                    | 85.4      | 2.88                                                            | [2]  |
| TTA-TPH-CuCo                             | 0.5 M K <sub>2</sub> SO <sub>4</sub> + 0.1 M KNO <sub>3</sub>                | -0.75                    | 92.31     | 13.49                                                           | [3]  |
| TpBpy-Cu-F                               | 0.5 M Na <sub>2</sub> SO <sub>4</sub> + 0.1 M NaNO <sub>3</sub>              | -0.746                   | 82.6      | 2.72                                                            | [4]  |
| Mo-HATN-COFs                             | 0.5 M Na <sub>2</sub> SO <sub>4</sub> + 0.1 M NaNO <sub>3</sub>              | -0.4                     | 91.3      | 6.6                                                             | [5]  |
| NiPc-CZDM-COF                            | 0.5 M K <sub>2</sub> SO <sub>4</sub> + 0.1 M KNO <sub>3</sub>                | -1.2                     | 96.6      | 19.5                                                            | [6]  |
| CuPOR-COF                                | 1 M KOH + 1 M KNO <sub>3</sub>                                               | -0.67                    | 86        | 6.0                                                             | [7]  |
| ImPy-COF-Mn                              | NO <sub>3</sub> <sup>-</sup> (2mg mL <sup>-1</sup> ) + 1 M KOH<br>+ 0.5 M KF | -0.7                     | 95.64     | 6.43                                                            | [8]  |
| NiTP-CoTAPP MCOF                         | 0.5 M KNO <sub>3</sub>                                                       | -0.8                     | 85.6      | 1.09                                                            | [9]  |
| Zn <sub>5</sub> -NiS <sub>4</sub> TP MOF | 0.05 M K <sub>2</sub> SO <sub>4</sub> + 0.5 M KNO <sub>3</sub>               | -1.2                     | 92.87     | 4.15                                                            | [10] |
| Cu-O <sub>2</sub> N <sub>2</sub> -MOF    | 0.1 M KOH + 0.1 M KNO <sub>3</sub>                                           | -0.7                     | 96.28     | 2.62                                                            | [11] |
| Ni-BDC@Co-HHTP                           | 1 M KOH + 0.1 M NaNO <sub>3</sub>                                            | -0.7                     | 98.4      | 11.46                                                           | [12] |
| CoFe-cMOFs                               | 1 M Na <sub>2</sub> SO <sub>4</sub> + 0.5 M KNO <sub>3</sub>                 | -0.7                     | 94.3      | 14.1                                                            | [13] |
| NJUZ-2                                   | 0.1 M Na <sub>2</sub> SO <sub>4</sub> + 0.1 M KNO <sub>3</sub>               | -0.8                     | 98.4      | 1.76                                                            | [14] |
| Co-TATB                                  | 0.1 M Na <sub>2</sub> SO <sub>4</sub> + 0.1 M KNO <sub>3</sub>               | -1.0                     | 97.2      | 2.58                                                            | [15] |
| HUST-38                                  | 0.5 M K <sub>2</sub> SO <sub>4</sub> + 0.1 M KNO <sub>3</sub>                | -0.6                     | 95.7      | 2.01                                                            | [16] |
| Cu <sub>1</sub> Co <sub>1</sub> HHTP     | 0.5 M Na <sub>2</sub> SO <sub>4</sub> + 0.1 M NaNO <sub>3</sub>              | -0.6                     | 96.4      | 5.1                                                             | [17] |
| DiMe-Cu <sub>3</sub> -MOF                | 0.5 M K <sub>2</sub> SO <sub>4</sub> + 0.05 M KNO <sub>3</sub>               | -0.94                    | 95        | 7.48                                                            | [18] |

### 3. Synthesis and characterizations of PCOFs

#### 3.1 Synthesis of 2,2'-(4-nitrophenyl)methylene)bis(1H-pyrrole) (NPBPR)

NPBPR was synthesized according to the literature<sup>[19]</sup>. Briefly, 4-Nitrobenzaldehyde (6.04 g, 0.04 mol) and pyrrole (83 mL, 1.2 mol) were added to a 250 mL round-bottom flask, followed by the slowly addition of 1 mL trifluoroacetic acid (TFA). The mixture was stirred at room temperature under darkness. After 1 h, the reaction was quenched with triethylamine (TEA), and the excess pyrrole was removed under reduced pressure. The crude product was purified by column chromatography (silica, dichloromethane (CH<sub>2</sub>Cl<sub>2</sub>)) to afford NPBPR as bright yellow solid (5.87 g, 55% yield). <sup>1</sup>H NMR (400 MHz, Chloroform-*d*) δ 8.19 (d, *J* = 8.8 Hz, 2H), 8.01 (s, 2H), 7.40 (d, *J* = 8.7 Hz, 2H), 6.77 (td, *J* = 2.7, 1.5 Hz, 2H), 6.20 (q, *J* = 2.9 Hz, 2H), 5.94 - 5.85 (m, 2H), 5.61 (s, 1H).

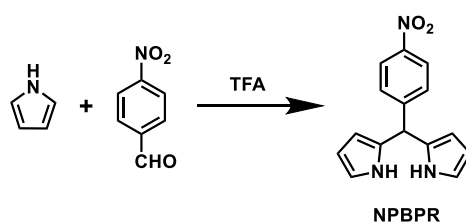

**Figure S1.** Schematic illustration of the synthesis of NPBPR.

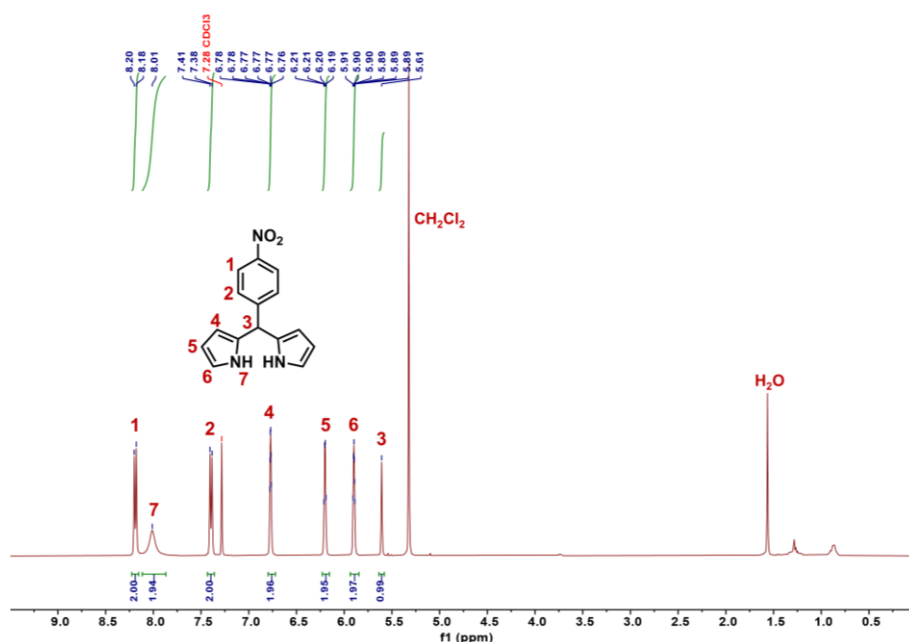

**Figure S2.** <sup>1</sup>H NMR spectrum of NPBPR in CDCl<sub>3</sub>.

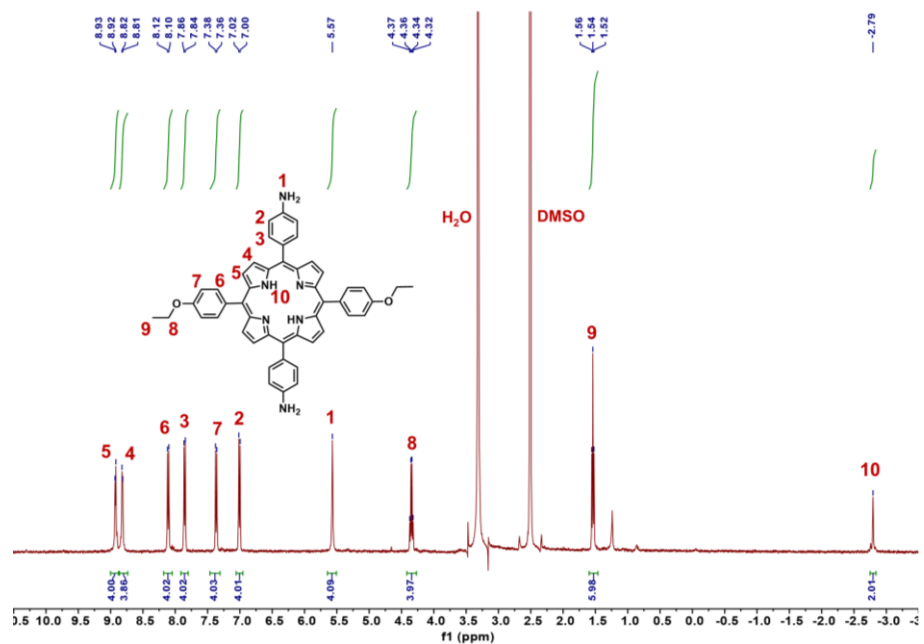

Figure S3.  $^1\text{H}$  NMR spectrum of EDAPP in  $\text{DMSO-}d_6$ .

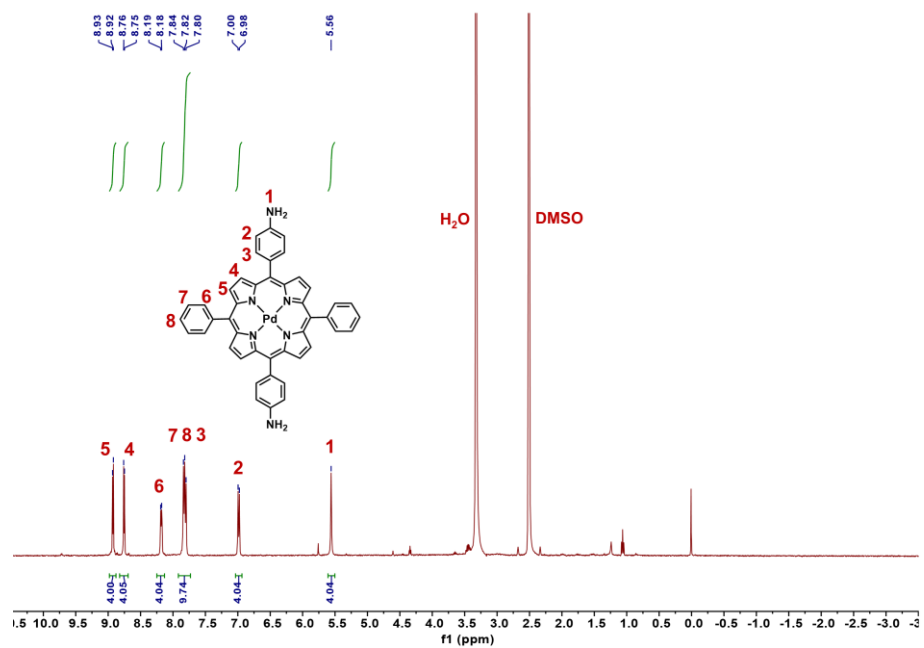

Figure S4.  $^1\text{H}$  NMR spectra of Pd-DAPP in  $\text{DMSO-}d_6$ .

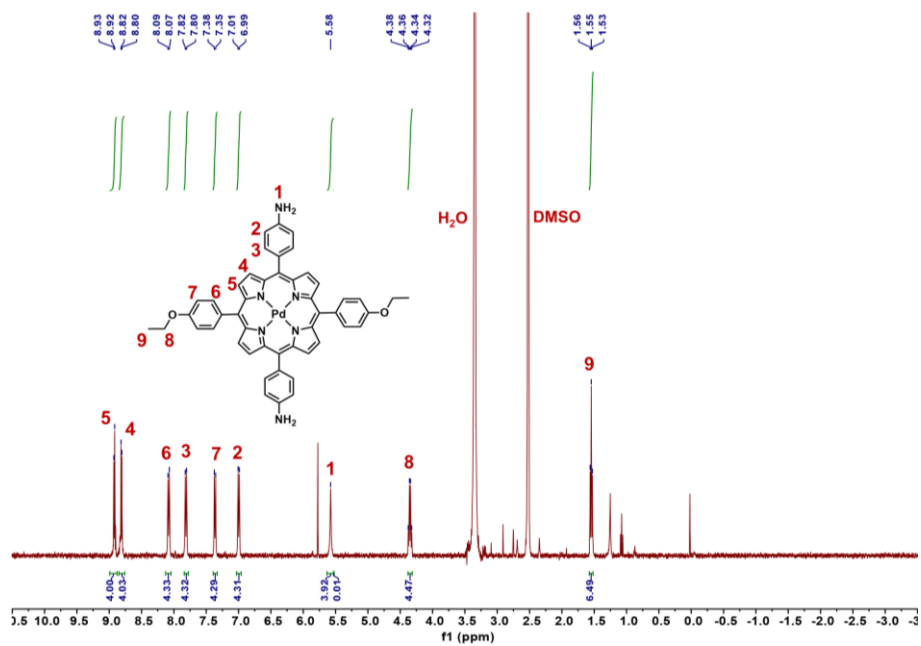

Figure S5.  $^1\text{H}$  NMR spectrum of Pd-EDAPP in  $\text{DMSO-}d_6$ .

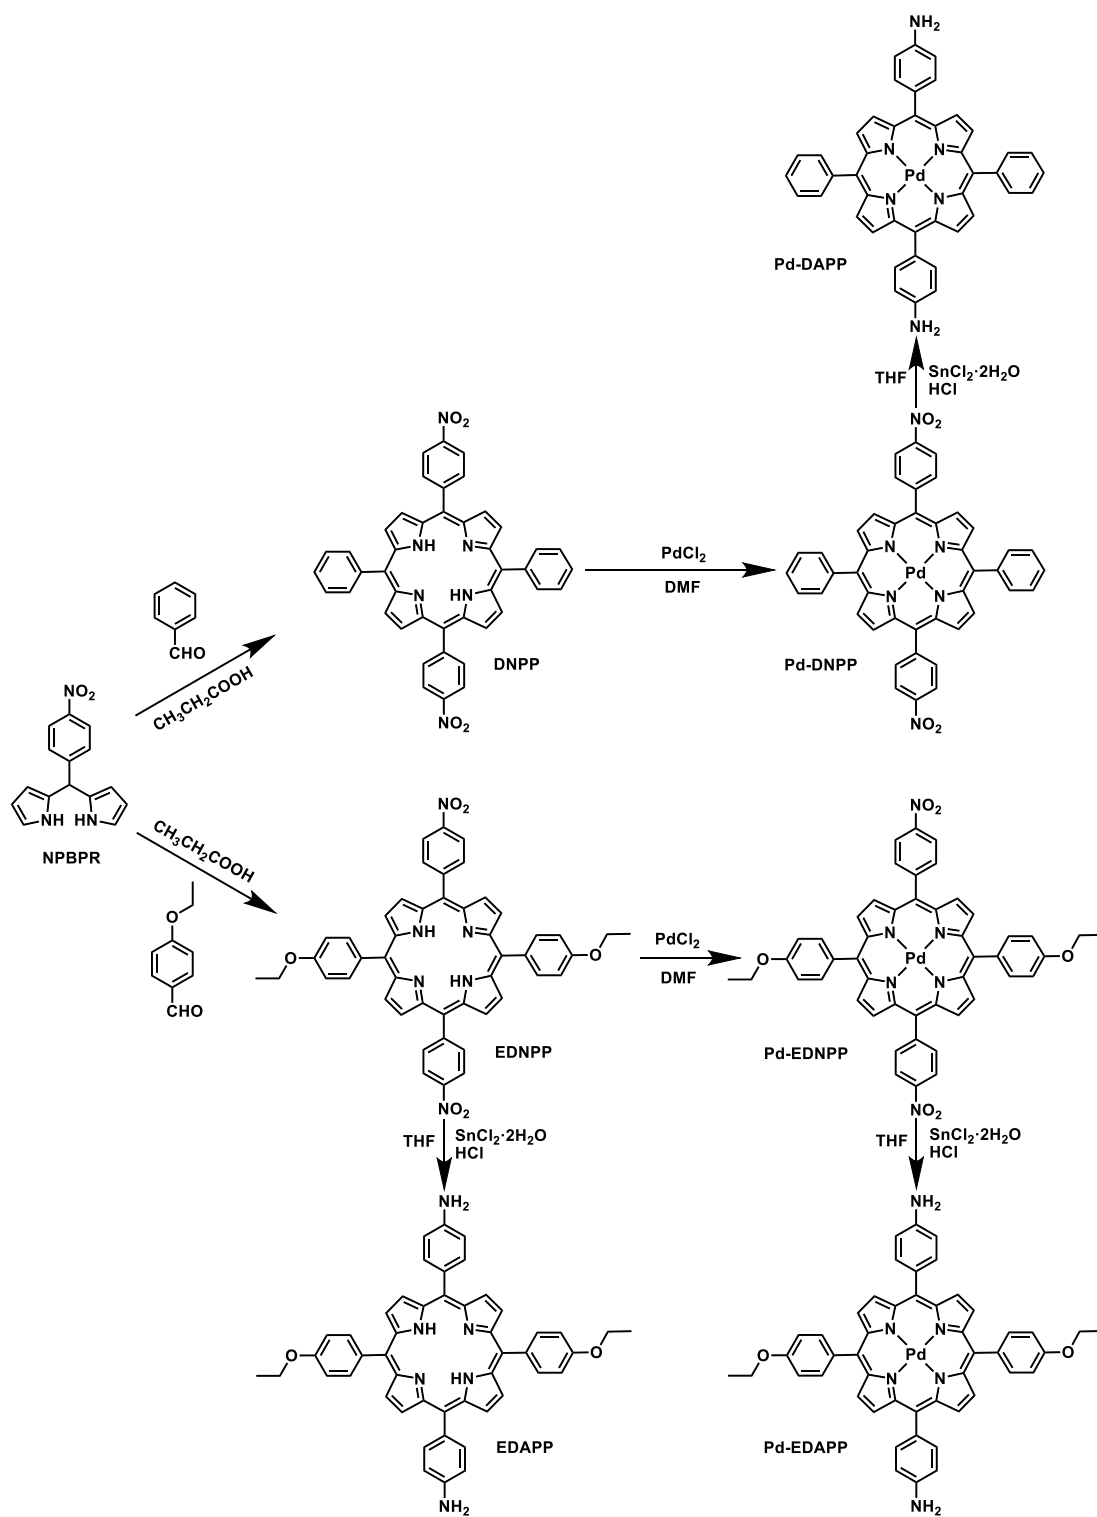

**Figure S6.** Schematic illustration of the synthesis of Pd-DAPP, Pd-EDAPP and EDAPP.

### 3.2 Synthesis of $\text{Cu}_3(\text{PyCA})_3$

$\text{Cu}_3(\text{PyCA})_3$  (PyCA = 1H-pyrazole-4-carbaldehyde) was prepared according to previously reported procedures.<sup>[20]</sup>  $\text{Cu}(\text{NO}_3)_2 \cdot 3\text{H}_2\text{O}$  (0.2 g, 0.83 mmol) and 1H-pyrazole-4-carbaldehyde (0.096 g, 1.0 mmol) were added to a 20 mL sample vial and 6.7 mL *N,N*-dimethylformamide (DMF), 6.7 mL ethanol (EtOH), and 5.0 mL  $\text{H}_2\text{O}$  were subsequently added to the vial. After being sonicated for 10 min, the mixture was left in an oven at 100 °C for 12 h and then cooled down to room temperature. The light-yellow single crystals were collected by centrifugation, washed sequentially with  $\text{H}_2\text{O}$  and acetone several times, and dried at 100 °C for 12 h. The product was obtained as a light-yellow solid (103 mg, 78% yield).

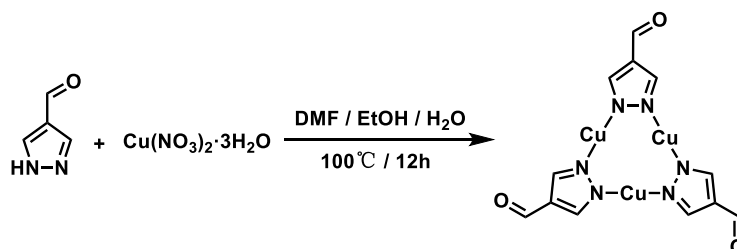

**Figure S7.** Schematic illustration of the synthesis of  $\text{Cu}_3(\text{PyCA})_3$ .

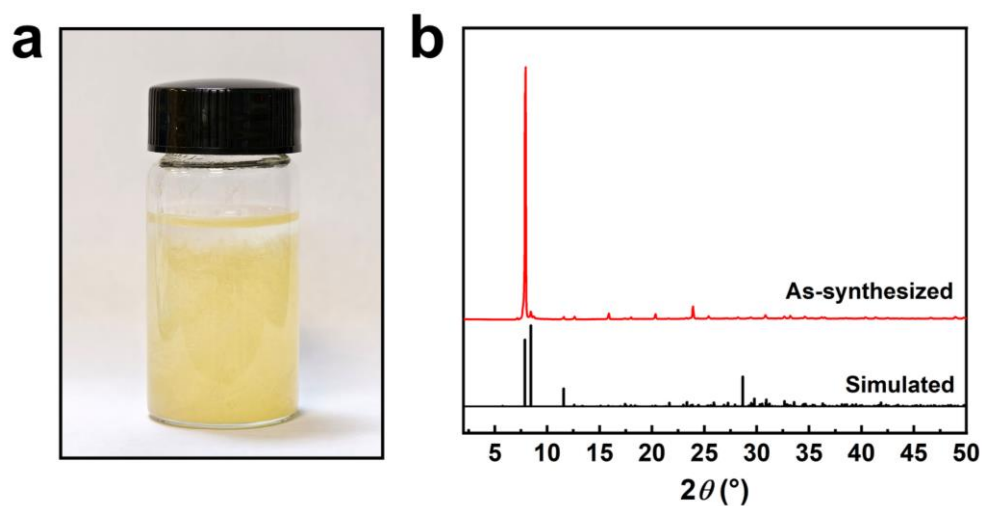

**Figure S8.** Photograph of the as-synthesized  $\text{Cu}_3(\text{PyCA})_3$  before sonication (a). Powder X-ray diffraction (PXRD) pattern of as-synthesized  $\text{Cu}_3(\text{PyCA})_3$  (b) and the along with simulated pattern from CCDC 2026064.<sup>[19]</sup>

### 3.3 Synthesis of Pd-PCOF-1(Cu<sub>3</sub>)

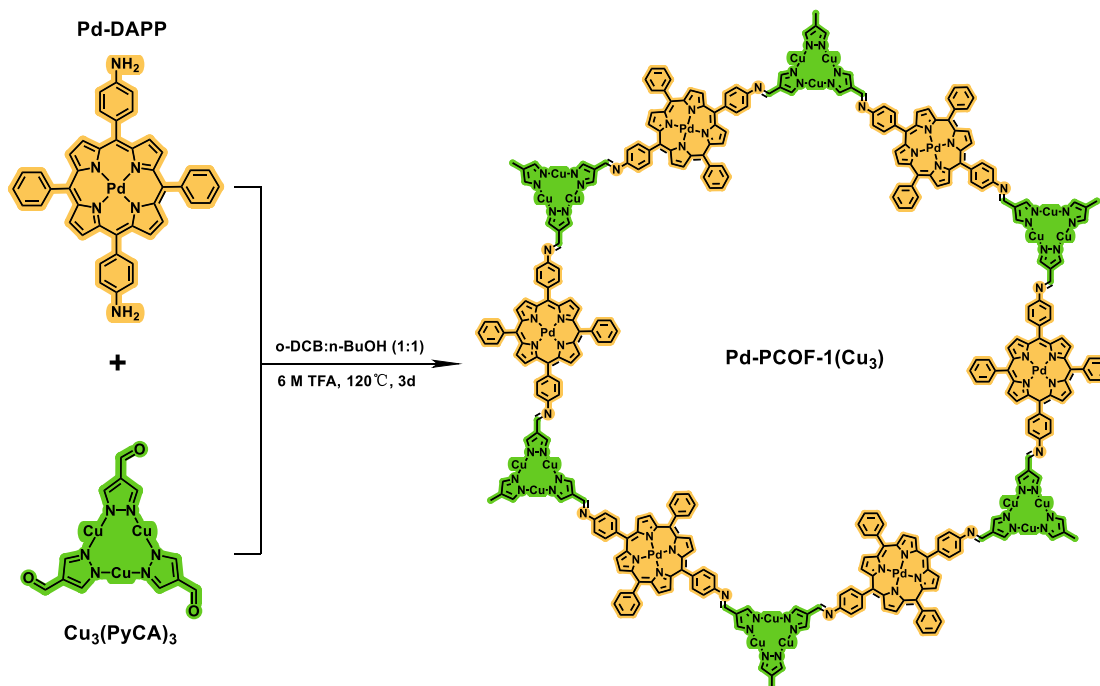

**Figure S9.** Schematic illustration of the synthesis of Pd-PCOF-1(Cu<sub>3</sub>).

### 3.4 Synthesis of Pd-PCOF-2(Cu<sub>3</sub>) and PCOF-2(Cu<sub>3</sub>)

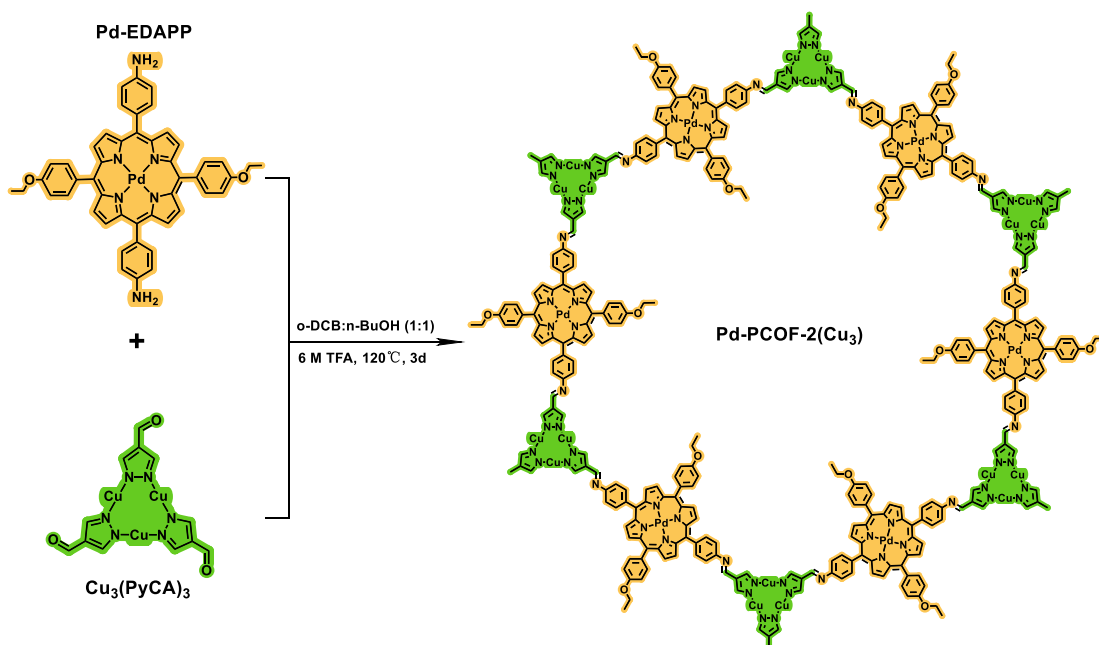

**Figure S10.** Schematic illustration of the synthesis of Pd-PCOF-2(Cu<sub>3</sub>).

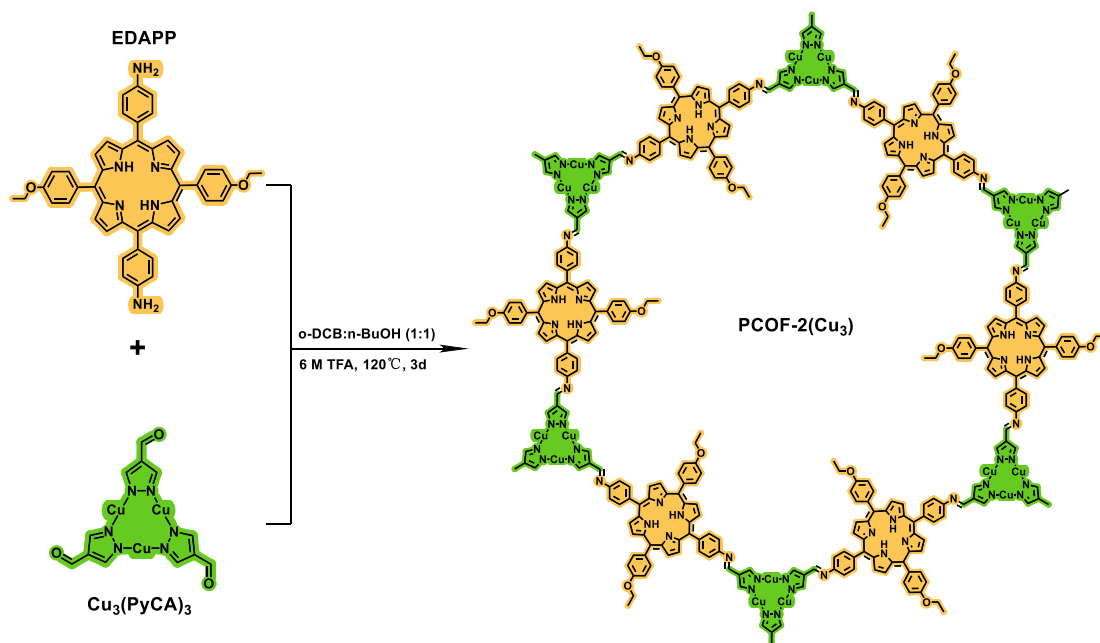

**Figure S11.** Schematic illustration of the synthesis of PCOF-2(Cu<sub>3</sub>).

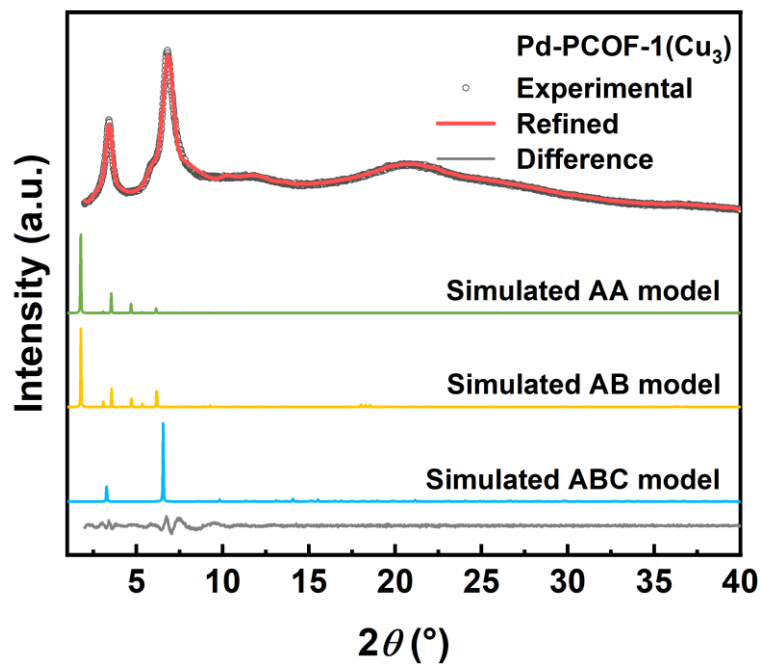

**Figure S12.** PXRD patterns of Pd-PCOF-1(Cu<sub>3</sub>) with the experimental profiles, Pawley refined, difference curve, and simulated profiles of AA, AB, and ABC models.

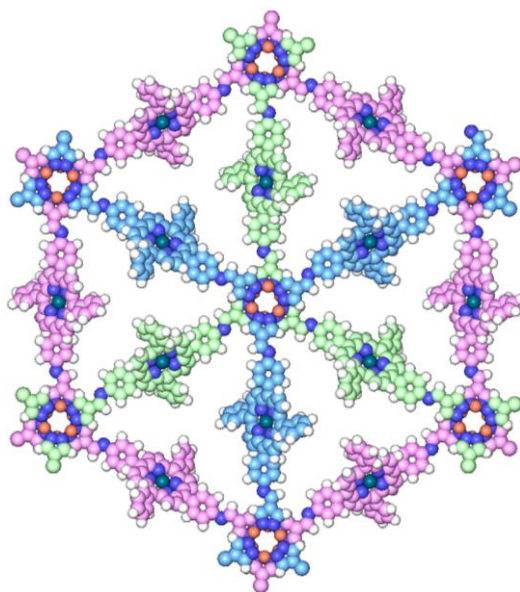

**Figure S13.** ABC stacking model of Pd-PCOF-1(Cu<sub>3</sub>) viewed from *c* axis. The dark green, orange, dark blue and white spheres refer to palladium, copper, nitrogen and hydrogen, respectively.

**Table S2.** Fractional atomic coordinates for Pd-PCOF-1(Cu<sub>3</sub>)-AA.

| <b>Pd-PCOF-1(Cu<sub>3</sub>)-AA</b>                                     |             |          |          |          |
|-------------------------------------------------------------------------|-------------|----------|----------|----------|
| <b>Space group symmetry: <i>P6/m</i></b>                                |             |          |          |          |
| <b><math>a = b = 57.593 \text{ \AA}, c = 3.439 \text{ \AA}</math></b>   |             |          |          |          |
| <b><math>\alpha = \beta = 90.00^\circ, \gamma = 120.00^\circ</math></b> |             |          |          |          |
| <b>Number</b>                                                           | <b>Atom</b> | <b>x</b> | <b>y</b> | <b>z</b> |
| 1                                                                       | C           | 13.964   | 29.208   | 1.719    |
| 2                                                                       | C           | 12.75    | 28.896   | 1.719    |
| 3                                                                       | C           | 12.602   | 27.486   | 1.719    |
| 4                                                                       | N           | 13.895   | 26.948   | 1.719    |
| 5                                                                       | C           | 14.778   | 28.039   | 1.719    |
| 6                                                                       | C           | 18.566   | 25.334   | 1.719    |
| 7                                                                       | C           | 18.248   | 26.593   | 1.719    |
| 8                                                                       | C           | 16.906   | 26.736   | 1.719    |
| 9                                                                       | N           | 16.376   | 25.45    | 1.719    |
| 10                                                                      | C           | 17.455   | 24.577   | 1.719    |
| 11                                                                      | C           | 16.227   | 28.108   | 1.719    |
| 12                                                                      | C           | 17.524   | 23.026   | 1.719    |
| 13                                                                      | C           | 18.981   | 22.165   | 1.719    |
| 14                                                                      | C           | 17.083   | 29.532   | 1.719    |
| 15                                                                      | C           | 18.53    | 29.667   | 1.719    |
| 16                                                                      | C           | 19.263   | 30.864   | 1.719    |
| 17                                                                      | C           | 18.631   | 32.073   | 1.719    |
| 18                                                                      | C           | 17.266   | 32.081   | 1.719    |
| 19                                                                      | C           | 16.538   | 30.881   | 1.719    |
| 20                                                                      | C           | 19.141   | 20.722   | 1.719    |
| 21                                                                      | C           | 20.355   | 20.013   | 1.719    |
| 22                                                                      | C           | 21.564   | 20.676   | 1.719    |
| 23                                                                      | C           | 21.526   | 22.044   | 1.719    |
| 24                                                                      | C           | 20.31    | 22.742   | 1.719    |
| 25                                                                      | C           | 24.854   | 16.933   | 1.719    |
| 26                                                                      | N           | 26.201   | 16.882   | 1.719    |
| 27                                                                      | N           | 26.664   | 18.127   | 1.719    |
| 28                                                                      | C           | 25.612   | 18.968   | 1.719    |
| 29                                                                      | C           | 24.448   | 18.241   | 1.719    |
| 30                                                                      | C           | 23.07    | 18.739   | 1.719    |
| 31                                                                      | N           | 22.843   | 20.018   | 1.719    |
| 32                                                                      | Cu          | 28.386   | 19.05    | 1.719    |
| 33                                                                      | H           | 14.092   | 30.219   | 1.719    |

|    |    |        |        |       |
|----|----|--------|--------|-------|
| 34 | H  | 12.138 | 29.711 | 1.719 |
| 35 | H  | 19.572 | 25.186 | 1.719 |
| 36 | H  | 19.076 | 27.184 | 1.719 |
| 37 | H  | 19.296 | 28.986 | 1.719 |
| 38 | H  | 20.349 | 30.855 | 1.719 |
| 39 | H  | 16.761 | 33.043 | 1.719 |
| 40 | H  | 15.582 | 31.254 | 1.719 |
| 41 | H  | 18.463 | 19.951 | 1.719 |
| 42 | H  | 20.328 | 18.931 | 1.719 |
| 43 | H  | 22.469 | 22.585 | 1.719 |
| 44 | H  | 20.64  | 23.714 | 1.719 |
| 45 | H  | 24.212 | 16.062 | 1.719 |
| 46 | H  | 25.695 | 20.047 | 1.719 |
| 47 | H  | 22.268 | 18.016 | 1.719 |
| 48 | H  | 19.194 | 32.997 | 1.719 |
| 49 | Pd | 43.194 | 24.938 | 1.719 |

---

**Table S3.** Fractional atomic coordinates for Pd-PCOF-1(Cu<sub>3</sub>)-AB.

| <b>Pd-PCOF-1(Cu<sub>3</sub>)-AB</b>                                     |             |          |          |          |
|-------------------------------------------------------------------------|-------------|----------|----------|----------|
| <b>Space group symmetry: <i>P63/m</i></b>                               |             |          |          |          |
| <b><math>a = b = 57.297 \text{ \AA}, c = 4.949 \text{ \AA}</math></b>   |             |          |          |          |
| <b><math>\alpha = \beta = 90.00^\circ, \gamma = 120.00^\circ</math></b> |             |          |          |          |
| <b>Number</b>                                                           | <b>Atom</b> | <b>x</b> | <b>y</b> | <b>z</b> |
| 1                                                                       | C           | 42.539   | 12.43    | 1.237    |
| 2                                                                       | C           | 41.284   | 12.105   | 1.237    |
| 3                                                                       | C           | 41.133   | 10.767   | 1.237    |
| 4                                                                       | N           | 42.438   | 10.248   | 1.237    |
| 5                                                                       | C           | 43.323   | 11.338   | 1.237    |
| 6                                                                       | C           | 47.088   | 8.672    | 1.237    |
| 7                                                                       | C           | 46.783   | 9.941    | 1.237    |
| 8                                                                       | C           | 45.446   | 10.123   | 1.237    |
| 9                                                                       | N           | 44.906   | 8.75     | 1.237    |
| 10                                                                      | C           | 45.995   | 7.877    | 1.237    |
| 11                                                                      | C           | 44.786   | 11.423   | 1.237    |
| 12                                                                      | C           | 46.06    | 6.413    | 1.237    |
| 13                                                                      | C           | 47.42    | 5.614    | 1.237    |
| 14                                                                      | C           | 45.573   | 12.782   | 1.237    |
| 15                                                                      | C           | 47.022   | 12.95    | 1.237    |
| 16                                                                      | C           | 47.739   | 14.157   | 1.237    |
| 17                                                                      | C           | 47.094   | 15.356   | 1.237    |
| 18                                                                      | C           | 45.734   | 15.348   | 1.237    |
| 19                                                                      | C           | 45.019   | 14.137   | 1.237    |
| 20                                                                      | C           | 47.601   | 4.163    | 1.237    |
| 21                                                                      | C           | 48.814   | 3.443    | 1.237    |
| 22                                                                      | C           | 50.026   | 4.093    | 1.237    |
| 23                                                                      | C           | 49.991   | 5.458    | 1.237    |
| 24                                                                      | C           | 48.774   | 6.165    | 1.237    |
| 25                                                                      | C           | 53.315   | 0.339    | 1.237    |
| 26                                                                      | N           | 54.664   | 0.281    | 1.237    |
| 27                                                                      | N           | 55.131   | 1.523    | 1.237    |
| 28                                                                      | C           | 54.077   | 2.367    | 1.237    |
| 29                                                                      | C           | 52.911   | 1.647    | 1.237    |
| 30                                                                      | C           | 51.532   | 2.149    | 1.237    |
| 31                                                                      | N           | 51.305   | 3.429    | 1.237    |
| 32                                                                      | Cu          | -0.396   | 2.389    | 1.237    |
| 33                                                                      | C           | 43.335   | 4.096    | 1.237    |

|    |    |        |        |       |
|----|----|--------|--------|-------|
| 34 | C  | 44.592 | 4.422  | 1.237 |
| 35 | C  | 44.744 | 5.761  | 1.237 |
| 36 | N  | 43.439 | 6.28   | 1.237 |
| 37 | C  | 42.552 | 5.19   | 1.237 |
| 38 | C  | 38.79  | 7.862  | 1.237 |
| 39 | C  | 39.093 | 6.593  | 1.237 |
| 40 | C  | 40.429 | 6.41   | 1.237 |
| 41 | N  | 40.972 | 7.78   | 1.237 |
| 42 | C  | 39.884 | 8.654  | 1.237 |
| 43 | C  | 41.086 | 5.109  | 1.237 |
| 44 | C  | 39.818 | 10.116 | 1.237 |
| 45 | C  | 38.459 | 10.915 | 1.237 |
| 46 | C  | 40.291 | 3.756  | 1.237 |
| 47 | C  | 38.839 | 3.592  | 1.237 |
| 48 | C  | 38.116 | 2.388  | 1.237 |
| 49 | C  | 38.757 | 1.189  | 1.237 |
| 50 | C  | 40.118 | 1.194  | 1.237 |
| 51 | C  | 40.839 | 2.4    | 1.237 |
| 52 | C  | 38.28  | 12.366 | 1.237 |
| 53 | C  | 37.07  | 13.088 | 1.237 |
| 54 | C  | 35.858 | 12.439 | 1.237 |
| 55 | C  | 35.889 | 11.075 | 1.237 |
| 56 | C  | 37.104 | 10.366 | 1.237 |
| 57 | C  | 32.589 | 16.205 | 1.237 |
| 58 | N  | 31.243 | 16.266 | 1.237 |
| 59 | N  | 30.771 | 15.024 | 1.237 |
| 60 | C  | 31.818 | 14.175 | 1.237 |
| 61 | C  | 32.987 | 14.894 | 1.237 |
| 62 | C  | 34.363 | 14.387 | 1.237 |
| 63 | N  | 34.583 | 13.107 | 1.237 |
| 64 | Cu | 29.042 | 14.114 | 1.237 |
| 65 | Pd | 14.336 | 8.302  | 1.237 |
| 66 | H  | 42.652 | 13.435 | 1.237 |
| 67 | H  | 40.705 | 12.937 | 1.237 |
| 68 | H  | 48.093 | 8.554  | 1.237 |
| 69 | H  | 47.63  | 10.51  | 1.237 |
| 70 | H  | 47.821 | 12.308 | 1.237 |
| 71 | H  | 48.826 | 14.166 | 1.237 |
| 72 | H  | 45.224 | 16.31  | 1.237 |
| 73 | H  | 44.073 | 14.549 | 1.237 |
| 74 | H  | 46.963 | 3.358  | 1.237 |
| 75 | H  | 48.791 | 2.358  | 1.237 |

|    |   |        |        |       |
|----|---|--------|--------|-------|
| 76 | H | 50.944 | 5.986  | 1.237 |
| 77 | H | 49.177 | 7.111  | 1.237 |
| 78 | H | 24.018 | 49.093 | 1.237 |
| 79 | H | 54.16  | 3.446  | 1.237 |
| 80 | H | 50.729 | 1.428  | 1.237 |
| 81 | H | 43.222 | 3.089  | 1.237 |
| 82 | H | 45.173 | 3.591  | 1.237 |
| 83 | H | 37.786 | 7.982  | 1.237 |
| 84 | H | 38.246 | 6.028  | 1.237 |
| 85 | H | 38.039 | 4.233  | 1.237 |
| 86 | H | 37.028 | 2.38   | 1.237 |
| 87 | H | 40.627 | 0.233  | 1.237 |
| 88 | H | 41.785 | 1.992  | 1.237 |
| 89 | H | 38.917 | 13.172 | 1.237 |
| 90 | H | 37.095 | 14.172 | 1.237 |
| 91 | H | 34.935 | 10.55  | 1.237 |
| 92 | H | 36.697 | 9.421  | 1.237 |
| 93 | H | 33.238 | 17.072 | 1.237 |
| 94 | H | 31.726 | 13.097 | 1.237 |
| 95 | H | 35.168 | 15.106 | 1.237 |
| 96 | H | 47.643 | 16.288 | 1.237 |
| 97 | H | 38.2   | 0.261  | 1.237 |

---

**Table S4.** Fractional atomic coordinates for Pd-PCOF-1(Cu<sub>3</sub>)-ABC.

| <b>Pd-PCOF-1(Cu<sub>3</sub>)-ABC</b>                                    |             |          |          |          |
|-------------------------------------------------------------------------|-------------|----------|----------|----------|
| <b>Space group symmetry: <i>R</i>-3</b>                                 |             |          |          |          |
| <b><math>a = b = 54.020 \text{ \AA}, c = 6.739 \text{ \AA}</math></b>   |             |          |          |          |
| <b><math>\alpha = \beta = 90.00^\circ, \gamma = 120.00^\circ</math></b> |             |          |          |          |
| <b>Number</b>                                                           | <b>Atom</b> | <b>x</b> | <b>y</b> | <b>z</b> |
| 1                                                                       | C           | -11.896  | 36.064   | -0.362   |
| 2                                                                       | C           | -10.851  | 36.212   | 0.492    |
| 3                                                                       | C           | -11.231  | 37.146   | 1.443    |
| 4                                                                       | N           | -12.467  | 37.628   | 1.149    |
| 5                                                                       | C           | -12.888  | 36.948   | 0.044    |
| 6                                                                       | C           | -16.971  | 39.175   | -0.122   |
| 7                                                                       | C           | -16.306  | 38.212   | -0.823   |
| 8                                                                       | C           | -15.149  | 37.92    | -0.121   |
| 9                                                                       | N           | -15.091  | 38.744   | 1.038    |
| 10                                                                      | C           | -16.227  | 39.479   | 1.016    |
| 11                                                                      | C           | -14.169  | 37.015   | -0.555   |
| 12                                                                      | C           | -16.581  | 40.479   | 1.94     |
| 13                                                                      | C           | -17.786  | 41.19    | 1.73     |
| 14                                                                      | C           | -14.514  | 36.114   | -1.598   |
| 15                                                                      | C           | -13.76   | 36.039   | -2.784   |
| 16                                                                      | C           | -14.118  | 35.148   | -3.801   |
| 17                                                                      | C           | -15.248  | 34.341   | -3.662   |
| 18                                                                      | C           | -16.017  | 34.415   | -2.5     |
| 19                                                                      | C           | -15.655  | 35.292   | -1.473   |
| 20                                                                      | C           | -17.761  | 42.575   | 1.487    |
| 21                                                                      | C           | -18.948  | 43.285   | 1.293    |
| 22                                                                      | C           | -20.19   | 42.618   | 1.338    |
| 23                                                                      | C           | -20.211  | 41.236   | 1.562    |
| 24                                                                      | C           | -19.025  | 40.526   | 1.756    |
| 25                                                                      | C           | -23.338  | 46.439   | 1.288    |
| 26                                                                      | N           | -24.645  | 46.512   | 1.595    |
| 27                                                                      | N           | -25.149  | 45.289   | 1.61     |
| 28                                                                      | C           | -24.171  | 44.414   | 1.322    |
| 29                                                                      | C           | -23.005  | 45.115   | 1.097    |
| 30                                                                      | C           | -21.645  | 44.571   | 1.041    |
| 31                                                                      | N           | -21.451  | 43.3     | 1.228    |
| 32                                                                      | Cu          | 27.267   | 44.778   | 2.594    |
| 33                                                                      | H           | -11.918  | 35.342   | -1.164   |

|    |    |         |        |        |
|----|----|---------|--------|--------|
| 34 | H  | -9.922  | 35.661 | 0.429  |
| 35 | H  | -17.886 | 39.641 | -0.459 |
| 36 | H  | -16.618 | 37.816 | -1.78  |
| 37 | H  | -12.9   | 36.674 | -2.924 |
| 38 | H  | -13.52  | 35.08  | -4.698 |
| 39 | H  | -16.892 | 33.787 | -2.39  |
| 40 | H  | -16.257 | 35.318 | -0.572 |
| 41 | H  | -16.816 | 43.106 | 1.443  |
| 42 | H  | -18.877 | 44.348 | 1.122  |
| 43 | H  | -21.157 | 40.711 | 1.607  |
| 44 | H  | -19.073 | 39.461 | 1.949  |
| 45 | H  | 4.365   | 0.483  | 1.376  |
| 46 | H  | -24.265 | 43.341 | 1.432  |
| 47 | H  | -20.823 | 45.263 | 0.932  |
| 48 | H  | -15.526 | 33.658 | -4.454 |
| 49 | Pd | 13.505  | 38.986 | 2.246  |

---

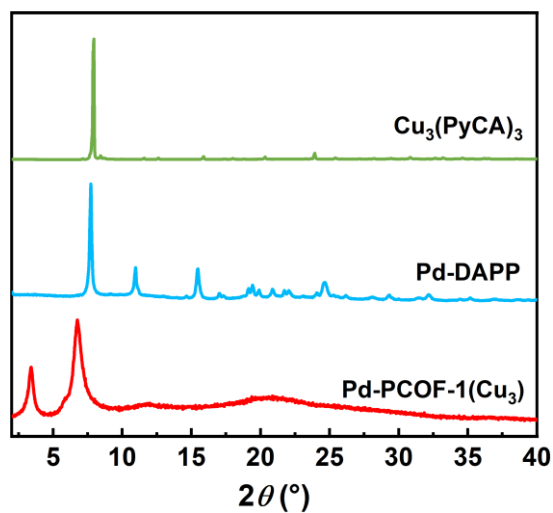

**Figure S14.** PXRD patterns of Pd-PCOF-1(Cu<sub>3</sub>), Cu<sub>3</sub>(PyCA)<sub>3</sub> and Pd-DAPP.

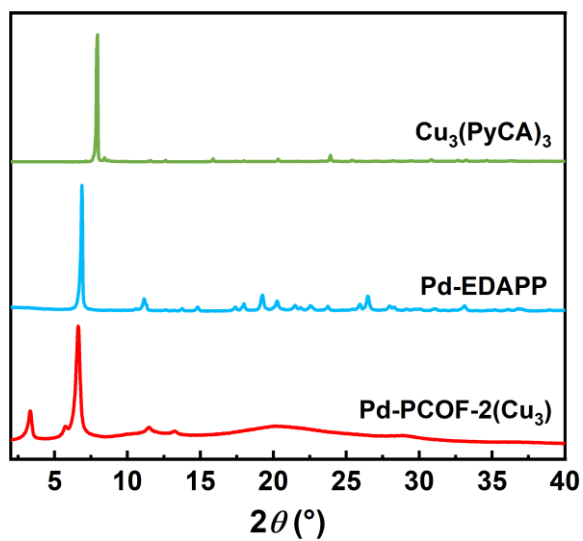

**Figure S15.** PXRD patterns of Pd-PCOF-2(Cu<sub>3</sub>), Cu<sub>3</sub>(PyCA)<sub>3</sub> and Pd-EDAPP.

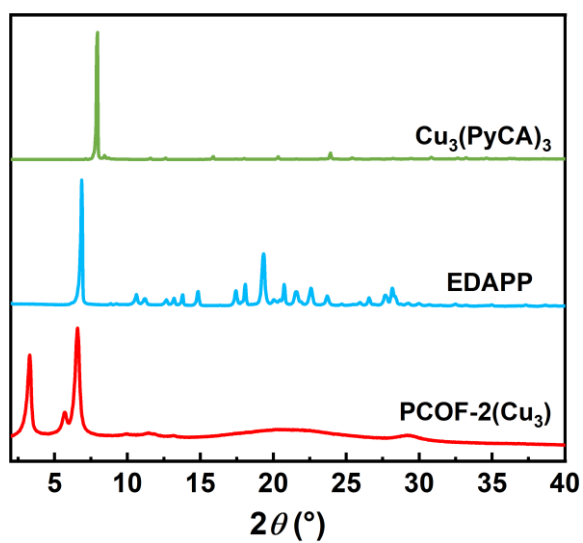

**Figure S16.** PXRD patterns of PCOF-2(Cu<sub>3</sub>), Cu<sub>3</sub>(PyCA)<sub>3</sub> and EDAPP.

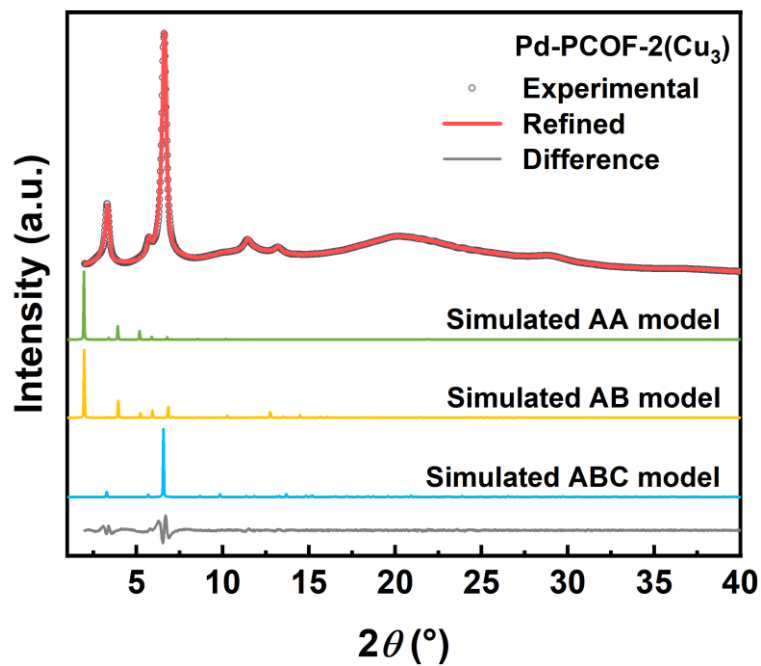

**Figure S17.** PXRD patterns of Pd-PCOF-2(Cu<sub>3</sub>) with the experimental profiles, Pawley refined, difference curve, and simulated profiles of AA, AB, and ABC models.

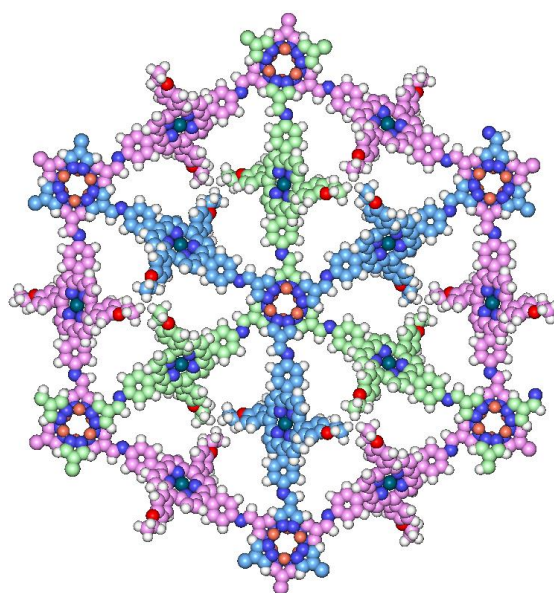

**Figure S18.** ABC stacking model of Pd-PCOF-2(Cu<sub>3</sub>) viewed from *c* axis. The dark green, orange, dark blue, red and white spheres refer to palladium, copper, nitrogen, oxygen and hydrogen, respectively.

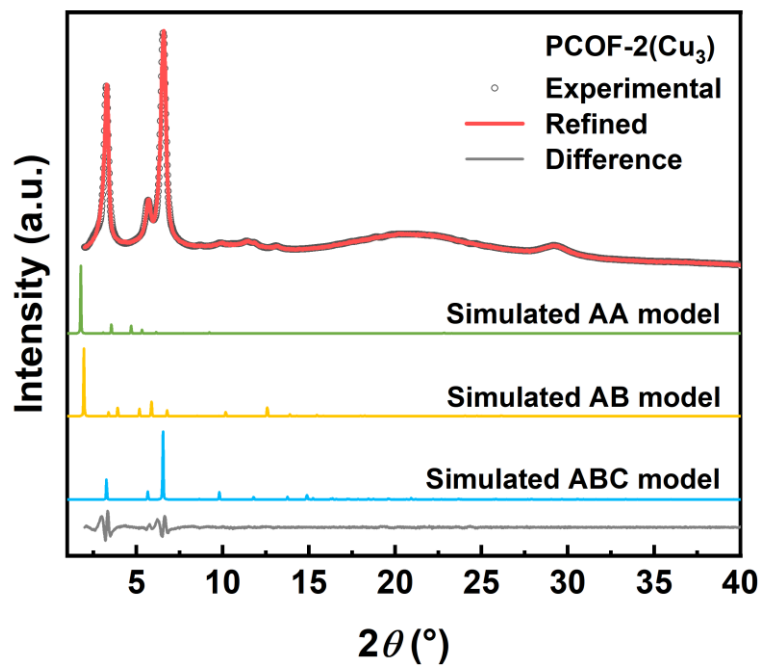

**Figure S19.** PXRD patterns of PCOF-2(Cu<sub>3</sub>) with the experimental profiles, Pawley refined, difference curve, and simulated profiles of AA, AB, and ABC models.

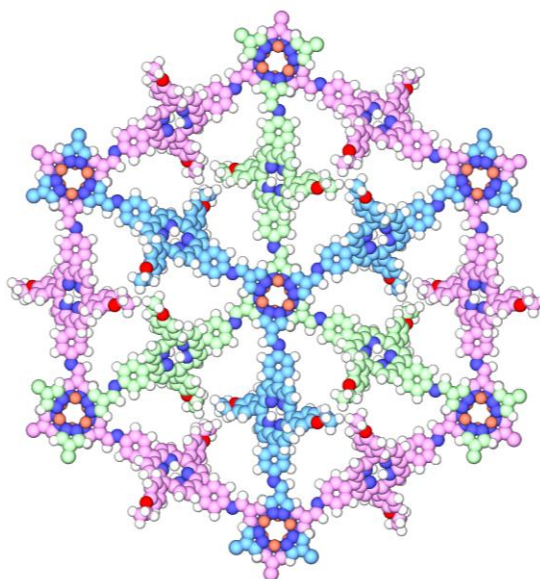

**Figure S20.** ABC stacking model of PCOF-2(Cu<sub>3</sub>) viewed from *c* axis. The orange, dark blue, red and white spheres refer to copper, nitrogen, oxygen and hydrogen, respectively.

**Table S5.** Fractional atomic coordinates for Pd-PCOF-2(Cu<sub>3</sub>)-AA.

| <b>Pd-PCOF-2(Cu<sub>3</sub>)-AA</b>                                     |             |          |          |          |
|-------------------------------------------------------------------------|-------------|----------|----------|----------|
| <b>Space group symmetry: <i>P3</i></b>                                  |             |          |          |          |
| <b><math>a = b = 52.094 \text{ \AA}, c = 4.277 \text{ \AA}</math></b>   |             |          |          |          |
| <b><math>\alpha = \beta = 90.00^\circ, \gamma = 120.00^\circ</math></b> |             |          |          |          |
| <b>Number</b>                                                           | <b>Atom</b> | <b>x</b> | <b>y</b> | <b>z</b> |
| 1                                                                       | C           | -14.113  | 40.65    | 1.561    |
| 2                                                                       | C           | -15.269  | 40.306   | 1.054    |
| 3                                                                       | C           | -15.251  | 38.854   | 0.869    |
| 4                                                                       | N           | -14.058  | 38.369   | 1.297    |
| 5                                                                       | C           | -13.321  | 39.427   | 1.715    |
| 6                                                                       | C           | -9.541   | 36.855   | 2.668    |
| 7                                                                       | C           | -9.971   | 38.14    | 2.826    |
| 8                                                                       | C           | -11.255  | 38.203   | 2.309    |
| 9                                                                       | N           | -11.641  | 36.971   | 1.903    |
| 10                                                                      | C           | -10.576  | 36.15    | 2.074    |
| 11                                                                      | C           | -11.987  | 39.397   | 2.166    |
| 12                                                                      | C           | -12.87   | 32.254   | 0.83     |
| 13                                                                      | C           | -11.622  | 32.613   | 1.015    |
| 14                                                                      | C           | -11.618  | 34.057   | 1.27     |
| 15                                                                      | N           | -12.884  | 34.522   | 1.172    |
| 16                                                                      | C           | -13.691  | 33.455   | 0.981    |
| 17                                                                      | C           | -10.497  | 34.791   | 1.703    |
| 18                                                                      | C           | -17.253  | 35.959   | -0.442   |
| 19                                                                      | C           | -16.911  | 34.649   | -0.269   |
| 20                                                                      | C           | -15.742  | 34.627   | 0.47     |
| 21                                                                      | N           | -15.291  | 35.895   | 0.615    |
| 22                                                                      | C           | -16.256  | 36.715   | 0.148    |
| 23                                                                      | C           | -16.321  | 38.107   | 0.333    |
| 24                                                                      | C           | -15.1    | 33.478   | 0.982    |
| 25                                                                      | C           | -9.192   | 34.077   | 1.887    |
| 26                                                                      | C           | -11.274  | 40.696   | 2.401    |
| 27                                                                      | C           | -17.644  | 38.785   | 0.135    |
| 28                                                                      | C           | -15.869  | 32.294   | 1.587    |
| 29                                                                      | C           | -10.085  | 40.988   | 1.708    |
| 30                                                                      | C           | -9.408   | 42.19    | 1.926    |
| 31                                                                      | C           | -9.923   | 43.147   | 2.806    |
| 32                                                                      | C           | -11.124  | 42.871   | 3.486    |
| 33                                                                      | C           | -11.773  | 41.648   | 3.302    |

|    |    |         |        |        |
|----|----|---------|--------|--------|
| 34 | C  | -9.106  | 32.973 | 2.747  |
| 35 | C  | -7.876  | 32.386 | 3.041  |
| 36 | C  | -6.692  | 32.909 | 2.494  |
| 37 | C  | -6.771  | 33.994 | 1.614  |
| 38 | C  | -8.011  | 34.558 | 1.293  |
| 39 | C  | -17.267 | 32.096 | 1.454  |
| 40 | C  | -17.915 | 31.003 | 2.038  |
| 41 | C  | -17.218 | 30.084 | 2.818  |
| 42 | C  | -15.851 | 30.309 | 3.048  |
| 43 | C  | -15.209 | 31.407 | 2.473  |
| 44 | C  | -17.785 | 39.918 | -0.682 |
| 45 | C  | -18.979 | 40.647 | -0.696 |
| 46 | C  | -20.071 | 40.227 | 0.085  |
| 47 | C  | -19.972 | 39.035 | 0.805  |
| 48 | C  | -18.768 | 38.332 | 0.846  |
| 49 | C  | -3.454  | 29.759 | 4.518  |
| 50 | N  | -2.326  | 29.944 | 5.226  |
| 51 | N  | -2.01   | 31.228 | 5.208  |
| 52 | C  | -2.924  | 31.893 | 4.479  |
| 53 | C  | -3.861  | 30.983 | 4.025  |
| 54 | C  | -5.143  | 31.274 | 3.378  |
| 55 | N  | -5.403  | 32.47  | 2.948  |
| 56 | Cu | -0.588  | 32.028 | 6.282  |
| 57 | C  | -22.624 | 44.334 | 0.913  |
| 58 | N  | -23.797 | 44.529 | 1.541  |
| 59 | N  | -24.466 | 43.389 | 1.565  |
| 60 | C  | -23.732 | 42.438 | 0.964  |
| 61 | C  | -22.547 | 43.008 | 0.536  |
| 62 | C  | -21.334 | 42.305 | 0.108  |
| 63 | N  | -21.256 | 41.017 | 0.254  |
| 64 | Cu | 26.008  | 43.077 | 2.607  |
| 65 | O  | -9.239  | 44.308 | 2.968  |
| 66 | O  | 34.149  | 29.01  | 3.37   |
| 67 | C  | 34.874  | 27.974 | 4.037  |
| 68 | C  | 33.901  | 26.908 | 4.514  |
| 69 | C  | 16.382  | 0.283  | 3.7    |
| 70 | C  | 17.425  | 1.386  | 3.622  |
| 71 | Pd | 12.248  | 38.559 | 1.26   |
| 72 | H  | -13.834 | 41.671 | 1.77   |
| 73 | H  | -16.059 | 41.011 | 0.844  |
| 74 | H  | -8.566  | 36.498 | 2.957  |
| 75 | H  | -9.385  | 38.937 | 3.26   |

|     |   |         |        |        |
|-----|---|---------|--------|--------|
| 76  | H | -13.198 | 31.245 | 0.619  |
| 77  | H | -10.784 | 31.932 | 0.989  |
| 78  | H | -18.141 | 36.309 | -0.944 |
| 79  | H | -17.429 | 33.827 | -0.732 |
| 80  | H | -9.682  | 40.284 | 0.993  |
| 81  | H | -8.491  | 42.391 | 1.387  |
| 82  | H | -11.553 | 43.583 | 4.179  |
| 83  | H | -12.68  | 41.454 | 3.846  |
| 84  | H | -9.991  | 32.585 | 3.218  |
| 85  | H | -7.85   | 31.578 | 3.76   |
| 86  | H | -5.868  | 34.419 | 1.196  |
| 87  | H | -8.043  | 35.409 | 0.63   |
| 88  | H | -17.922 | 32.786 | 0.974  |
| 89  | H | -18.982 | 30.881 | 1.897  |
| 90  | H | -15.272 | 29.669 | 3.697  |
| 91  | H | -14.194 | 31.574 | 2.782  |
| 92  | H | -16.949 | 40.278 | -1.256 |
| 93  | H | -19.038 | 41.54  | -1.304 |
| 94  | H | -20.807 | 38.693 | 1.404  |
| 95  | H | -18.703 | 37.455 | 1.472  |
| 96  | H | -3.976  | 28.816 | 4.43   |
| 97  | H | -2.953  | 32.968 | 4.365  |
| 98  | H | -5.884  | 30.487 | 3.322  |
| 99  | H | -21.831 | 45.068 | 0.858  |
| 100 | H | -23.991 | 41.388 | 0.943  |
| 101 | H | -20.461 | 42.892 | -0.149 |
| 102 | H | 35.404  | 28.381 | 4.923  |
| 103 | H | 35.605  | 27.509 | 3.339  |
| 104 | H | 34.456  | 26.102 | 5.038  |
| 105 | H | 33.361  | 26.472 | 3.647  |
| 106 | H | 33.166  | 27.354 | 5.217  |
| 107 | H | 16.241  | -0.003 | 4.763  |
| 108 | H | 15.421  | 0.662  | 3.288  |
| 109 | H | 18.388  | 1.028  | 4.043  |
| 110 | H | 17.083  | 2.267  | 4.205  |
| 111 | H | 17.578  | 1.691  | 2.565  |

---

**Table S6.** Fractional atomic coordinates for Pd-PCOF-2(Cu<sub>3</sub>)-AB.

| <b>Pd-PCOF-2(Cu<sub>3</sub>)-AB</b>                                     |             |          |          |          |
|-------------------------------------------------------------------------|-------------|----------|----------|----------|
| <b>Space group symmetry: <i>P63</i></b>                                 |             |          |          |          |
| <b><math>a = b = 51.712 \text{ \AA}, c = 7.301 \text{ \AA}</math></b>   |             |          |          |          |
| <b><math>\alpha = \beta = 90.00^\circ, \gamma = 120.00^\circ</math></b> |             |          |          |          |
| <b>Number</b>                                                           | <b>Atom</b> | <b>x</b> | <b>y</b> | <b>z</b> |
| 1                                                                       | C           | 38.821   | 11.688   | 1.708    |
| 2                                                                       | C           | 37.536   | 11.411   | 1.573    |
| 3                                                                       | C           | 37.408   | 9.953    | 1.604    |
| 4                                                                       | N           | 38.638   | 9.414    | 1.706    |
| 5                                                                       | C           | 39.53    | 10.411   | 1.861    |
| 6                                                                       | C           | 42.998   | 8.062    | 0.048    |
| 7                                                                       | C           | 42.805   | 9.256    | 0.706    |
| 8                                                                       | C           | 41.552   | 9.196    | 1.303    |
| 9                                                                       | N           | 40.966   | 8.03     | 0.957    |
| 10                                                                      | C           | 41.842   | 7.315    | 0.221    |
| 11                                                                      | C           | 40.923   | 10.233   | 2.039    |
| 12                                                                      | C           | 39.168   | 3.444    | 0.318    |
| 13                                                                      | C           | 40.262   | 3.843    | -0.305   |
| 14                                                                      | C           | 40.506   | 5.227    | 0.101    |
| 15                                                                      | N           | 39.513   | 5.615    | 0.923    |
| 16                                                                      | C           | 38.717   | 4.552    | 1.169    |
| 17                                                                      | C           | 41.637   | 5.997    | -0.248   |
| 18                                                                      | C           | 34.99    | 7.093    | 2.025    |
| 19                                                                      | C           | 35.38    | 5.779    | 2.147    |
| 20                                                                      | C           | 36.756   | 5.746    | 1.971    |
| 21                                                                      | N           | 37.194   | 6.994    | 1.711    |
| 22                                                                      | C           | 36.137   | 7.83     | 1.763    |
| 23                                                                      | C           | 36.193   | 9.237    | 1.647    |
| 24                                                                      | C           | 37.565   | 4.583    | 1.992    |
| 25                                                                      | C           | 42.754   | 5.302    | -0.941   |
| 26                                                                      | C           | 41.729   | 11.205   | 2.899    |
| 27                                                                      | C           | 34.93    | 10.011   | 1.781    |
| 28                                                                      | C           | 37.162   | 3.406    | 2.872    |
| 29                                                                      | C           | 43.113   | 11.03    | 3.144    |
| 30                                                                      | C           | 43.879   | 12.047   | 3.723    |
| 31                                                                      | C           | 43.278   | 13.237   | 4.133    |
| 32                                                                      | C           | 41.879   | 13.314   | 4.138    |
| 33                                                                      | C           | 41.118   | 12.286   | 3.58     |

|    |    |        |        |        |
|----|----|--------|--------|--------|
| 34 | C  | 43.373 | 4.212  | -0.312 |
| 35 | C  | 44.446 | 3.564  | -0.916 |
| 36 | C  | 44.945 | 4.011  | -2.15  |
| 37 | C  | 44.346 | 5.114  | -2.775 |
| 38 | C  | 43.239 | 5.743  | -2.186 |
| 39 | C  | 36.334 | 3.621  | 4.002  |
| 40 | C  | 35.795 | 2.552  | 4.722  |
| 41 | C  | 36.107 | 1.24   | 4.373  |
| 42 | C  | 37.114 | 1.019  | 3.425  |
| 43 | C  | 37.646 | 2.087  | 2.698  |
| 44 | C  | 34.735 | 10.831 | 2.904  |
| 45 | C  | 33.527 | 11.502 | 3.087  |
| 46 | C  | 32.479 | 11.343 | 2.165  |
| 47 | C  | 32.665 | 10.514 | 1.05   |
| 48 | C  | 33.891 | 9.868  | 0.846  |
| 49 | C  | 48.06  | 0.305  | -2.618 |
| 50 | N  | 49.359 | 0.247  | -2.277 |
| 51 | N  | 49.859 | 1.47   | -2.284 |
| 52 | C  | 48.89  | 2.336  | -2.634 |
| 53 | C  | 47.72  | 1.625  | -2.838 |
| 54 | C  | 46.362 | 2.159  | -2.694 |
| 55 | N  | 46.148 | 3.44   | -2.682 |
| 56 | Cu | 51.439 | 1.985  | -1.266 |
| 57 | C  | 29.403 | 14.848 | 3.774  |
| 58 | N  | 28.198 | 14.809 | 4.37   |
| 59 | N  | 27.74  | 13.569 | 4.336  |
| 60 | C  | 28.636 | 12.79  | 3.703  |
| 61 | C  | 29.712 | 13.577 | 3.335  |
| 62 | C  | 31.031 | 13.118 | 2.892  |
| 63 | N  | 31.191 | 11.921 | 2.415  |
| 64 | Cu | 26.236 | 12.924 | 5.406  |
| 65 | O  | 44.066 | 14.279 | 4.505  |
| 66 | O  | 35.454 | 0.189  | 5.036  |
| 67 | C  | 35.099 | -0.953 | 4.247  |
| 68 | C  | 33.642 | -1.306 | 4.493  |
| 69 | C  | 43.666 | 15.602 | 4.538  |
| 70 | C  | 44.843 | 16.486 | 4.913  |
| 71 | H  | 39.249 | 12.678 | 1.624  |
| 72 | H  | 36.754 | 12.14  | 1.408  |
| 73 | H  | 43.887 | 7.789  | -0.505 |
| 74 | H  | 43.484 | 10.097 | 0.672  |
| 75 | H  | 38.632 | 2.543  | 0.057  |

|     |    |        |        |        |
|-----|----|--------|--------|--------|
| 76  | H  | 40.787 | 3.278  | -1.065 |
| 77  | H  | 33.979 | 7.458  | 2.14   |
| 78  | H  | 34.714 | 4.945  | 2.319  |
| 79  | H  | 43.624 | 10.113 | 2.901  |
| 80  | H  | 44.951 | 11.924 | 3.807  |
| 81  | H  | 41.367 | 14.166 | 4.562  |
| 82  | H  | 40.053 | 12.361 | 3.706  |
| 83  | H  | 43.034 | 3.873  | 0.66   |
| 84  | H  | 44.924 | 2.745  | -0.394 |
| 85  | H  | 44.737 | 5.486  | -3.713 |
| 86  | H  | 42.779 | 6.589  | -2.682 |
| 87  | H  | 36.077 | 4.619  | 4.328  |
| 88  | H  | 35.096 | 2.746  | 5.525  |
| 89  | H  | 37.479 | 0.017  | 3.237  |
| 90  | H  | 38.442 | 1.837  | 2.032  |
| 91  | H  | 35.513 | 10.931 | 3.651  |
| 92  | H  | 33.39  | 12.103 | 3.977  |
| 93  | H  | 31.858 | 10.367 | 0.343  |
| 94  | H  | 34.019 | 9.229  | -0.019 |
| 95  | H  | 47.368 | -0.518 | -2.493 |
| 96  | H  | 48.973 | 3.408  | -2.517 |
| 97  | H  | 45.573 | 1.47   | -2.41  |
| 98  | H  | 30.05  | 15.715 | 3.758  |
| 99  | H  | 28.571 | 11.712 | 3.639  |
| 100 | H  | 31.882 | 13.776 | 3.028  |
| 101 | H  | 35.736 | -1.812 | 4.535  |
| 102 | H  | 35.231 | -0.785 | 3.162  |
| 103 | H  | 33.367 | -2.201 | 3.895  |
| 104 | H  | 32.992 | -0.457 | 4.192  |
| 105 | H  | 33.476 | -1.527 | 5.567  |
| 106 | H  | 43.294 | 15.905 | 3.535  |
| 107 | H  | 42.86  | 15.75  | 5.288  |
| 108 | H  | 45.715 | 16.268 | 4.261  |
| 109 | H  | 45.123 | 16.308 | 5.969  |
| 110 | H  | 44.562 | 17.554 | 4.798  |
| 111 | Pd | 39.085 | 82.06  | 5.007  |

---

**Table S7.** Fractional atomic coordinates for Pd-PCOF-2(Cu<sub>3</sub>)-ABC.

| <b>Pd-PCOF-2(Cu<sub>3</sub>)-ABC</b>                                                 |             |          |          |          |
|--------------------------------------------------------------------------------------|-------------|----------|----------|----------|
| <b>Space group symmetry: <i>R</i>-3</b>                                              |             |          |          |          |
| <b><math>a = b = 53.903 \text{ \AA}</math>, <math>c = 6.953 \text{ \AA}</math></b>   |             |          |          |          |
| <b><math>\alpha = \beta = 90.00^\circ</math>, <math>\gamma = 120.00^\circ</math></b> |             |          |          |          |
| <b>Number</b>                                                                        | <b>Atom</b> | <b>x</b> | <b>y</b> | <b>z</b> |
| 1                                                                                    | C           | -11.797  | 35.935   | -0.191   |
| 2                                                                                    | C           | -10.765  | 36.118   | 0.671    |
| 3                                                                                    | C           | -11.166  | 37.078   | 1.586    |
| 4                                                                                    | N           | -12.401  | 37.541   | 1.26     |
| 5                                                                                    | C           | -12.795  | 36.835   | 0.16     |
| 6                                                                                    | C           | -16.883  | 39.049   | -0.136   |
| 7                                                                                    | C           | -16.177  | 38.115   | -0.833   |
| 8                                                                                    | C           | -15.047  | 37.812   | -0.091   |
| 9                                                                                    | N           | -15.04   | 38.617   | 1.086    |
| 10                                                                                   | C           | -16.183  | 39.34    | 1.032    |
| 11                                                                                   | C           | -14.048  | 36.912   | -0.498   |
| 12                                                                                   | C           | -16.568  | 40.347   | 1.936    |
| 13                                                                                   | C           | -17.772  | 41.048   | 1.688    |
| 14                                                                                   | C           | -14.329  | 36.051   | -1.599   |
| 15                                                                                   | C           | -13.457  | 35.962   | -2.699   |
| 16                                                                                   | C           | -13.73   | 35.102   | -3.764   |
| 17                                                                                   | C           | -14.907  | 34.354   | -3.792   |
| 18                                                                                   | C           | -15.805  | 34.453   | -2.712   |
| 19                                                                                   | C           | -15.511  | 35.281   | -1.625   |
| 20                                                                                   | C           | -17.75   | 42.429   | 1.425    |
| 21                                                                                   | C           | -18.939  | 43.134   | 1.221    |
| 22                                                                                   | C           | -20.18   | 42.467   | 1.273    |
| 23                                                                                   | C           | -20.197  | 41.085   | 1.499    |
| 24                                                                                   | C           | -19.008  | 40.379   | 1.703    |
| 25                                                                                   | C           | -23.305  | 46.302   | 1.314    |
| 26                                                                                   | N           | -24.599  | 46.385   | 1.669    |
| 27                                                                                   | N           | -25.115  | 45.166   | 1.688    |
| 28                                                                                   | C           | -24.157  | 44.284   | 1.356    |
| 29                                                                                   | C           | -22.991  | 44.977   | 1.1      |
| 30                                                                                   | C           | -21.637  | 44.422   | 1        |
| 31                                                                                   | N           | -21.443  | 43.15    | 1.184    |
| 32                                                                                   | Cu          | 27.184   | 44.669   | 2.681    |
| 33                                                                                   | O           | -15.133  | 33.558   | -4.868   |

|    |    |         |        |        |
|----|----|---------|--------|--------|
| 34 | C  | 16.289  | -1.726 | 9.745  |
| 35 | C  | 16.159  | -0.972 | 11.057 |
| 36 | H  | -11.804 | 35.176 | -0.959 |
| 37 | H  | -9.835  | 35.567 | 0.64   |
| 38 | H  | -17.787 | 39.517 | -0.5   |
| 39 | H  | -16.446 | 37.749 | -1.815 |
| 40 | H  | -12.56  | 36.557 | -2.732 |
| 41 | H  | -13.025 | 35.019 | -4.578 |
| 42 | H  | -16.725 | 33.883 | -2.695 |
| 43 | H  | -16.204 | 35.31  | -0.792 |
| 44 | H  | -16.808 | 42.963 | 1.383  |
| 45 | H  | -18.869 | 44.197 | 1.045  |
| 46 | H  | -21.141 | 40.557 | 1.546  |
| 47 | H  | -19.054 | 39.315 | 1.903  |
| 48 | H  | -22.603 | 47.123 | 1.382  |
| 49 | H  | -24.261 | 43.211 | 1.45   |
| 50 | H  | -20.815 | 45.111 | 0.874  |
| 51 | H  | 16.461  | -0.994 | 8.925  |
| 52 | H  | 17.149  | -2.426 | 9.814  |
| 53 | H  | 15.388  | -0.178 | 10.964 |
| 54 | H  | 17.134  | -0.51  | 11.315 |
| 55 | H  | 15.869  | -1.664 | 11.872 |
| 56 | Pd | 13.476  | 38.901 | 2.318  |

---

**Table S8.** Fractional atomic coordinates for PCOF-2(Cu<sub>3</sub>)-AA.

| PCOF-2(Cu <sub>3</sub> )-AA                           |      |         |        |        |
|-------------------------------------------------------|------|---------|--------|--------|
| Space group symmetry: <i>P3</i>                       |      |         |        |        |
| $a = b = 51.514 \text{ \AA}, c = 4.333 \text{ \AA}$   |      |         |        |        |
| $\alpha = \beta = 90.00^\circ, \gamma = 120.00^\circ$ |      |         |        |        |
| Number                                                | Atom | x       | y      | z      |
| 1                                                     | C    | -13.912 | 41.347 | 0.804  |
| 2                                                     | C    | -15.146 | 40.907 | 0.891  |
| 3                                                     | C    | -15.128 | 39.758 | 1.797  |
| 4                                                     | N    | -13.855 | 39.494 | 2.177  |
| 5                                                     | C    | -13.096 | 40.472 | 1.635  |
| 6                                                     | C    | -9.464  | 38.343 | -0.016 |
| 7                                                     | C    | -9.829  | 39.603 | 0.374  |
| 8                                                     | C    | -10.955 | 39.476 | 1.167  |
| 9                                                     | N    | -11.304 | 38.168 | 1.246  |
| 10                                                    | C    | -10.377 | 37.468 | 0.549  |
| 11                                                    | C    | -11.696 | 40.555 | 1.708  |
| 12                                                    | C    | -12.504 | 33.285 | 0.914  |
| 13                                                    | C    | -11.278 | 33.726 | 0.766  |
| 14                                                    | C    | -11.347 | 35.188 | 0.758  |
| 15                                                    | N    | -12.626 | 35.579 | 0.962  |
| 16                                                    | C    | -13.369 | 34.456 | 1.089  |
| 17                                                    | C    | -10.263 | 36.058 | 0.491  |
| 18                                                    | C    | -17.342 | 36.757 | 2.198  |
| 19                                                    | C    | -16.913 | 35.477 | 1.989  |
| 20                                                    | C    | -15.567 | 35.543 | 1.659  |
| 21                                                    | N    | -15.172 | 36.842 | 1.689  |
| 22                                                    | C    | -16.24  | 37.59  | 2.069  |
| 23                                                    | C    | -16.252 | 39.012 | 2.216  |
| 24                                                    | C    | -14.758 | 34.404 | 1.375  |
| 25                                                    | C    | -8.915  | 35.475 | 0.195  |
| 26                                                    | C    | -11.043 | 41.881 | 2.071  |
| 27                                                    | C    | -17.439 | 39.715 | 2.864  |
| 28                                                    | C    | -15.404 | 33.056 | 1.422  |
| 29                                                    | C    | -9.647  | 41.986 | 2.267  |
| 30                                                    | C    | -9.054  | 43.18  | 2.686  |
| 31                                                    | C    | -9.834  | 44.294 | 2.991  |
| 32                                                    | C    | -11.227 | 44.206 | 2.843  |
| 33                                                    | C    | -11.819 | 43.021 | 2.398  |

|    |    |         |        |        |
|----|----|---------|--------|--------|
| 34 | C  | -8.744  | 34.443 | -0.745 |
| 35 | C  | -7.511  | 33.793 | -0.872 |
| 36 | C  | -6.408  | 34.215 | -0.107 |
| 37 | C  | -6.546  | 35.322 | 0.733  |
| 38 | C  | -7.789  | 35.93  | 0.905  |
| 39 | C  | -16.497 | 32.76  | 0.592  |
| 40 | C  | -17.118 | 31.511 | 0.654  |
| 41 | C  | -16.633 | 30.509 | 1.502  |
| 42 | C  | -15.519 | 30.796 | 2.321  |
| 43 | C  | -14.938 | 32.067 | 2.302  |
| 44 | C  | -17.814 | 41.051 | 2.575  |
| 45 | C  | -18.908 | 41.657 | 3.204  |
| 46 | C  | -19.672 | 40.947 | 4.139  |
| 47 | C  | -19.302 | 39.644 | 4.457  |
| 48 | C  | -18.173 | 39.066 | 3.88   |
| 49 | C  | -3.504  | 30.3   | 0.245  |
| 50 | N  | -2.29   | 30.172 | 0.811  |
| 51 | N  | -1.704  | 31.356 | 0.84   |
| 52 | C  | -2.535  | 32.269 | 0.309  |
| 53 | C  | -3.697  | 31.628 | -0.08  |
| 54 | C  | -4.988  | 32.259 | -0.373 |
| 55 | N  | -5.157  | 33.515 | -0.094 |
| 56 | Cu | -0.102  | 31.774 | 1.873  |
| 57 | C  | -22.373 | 44.483 | 6.329  |
| 58 | N  | -23.452 | 44.431 | 7.132  |
| 59 | N  | -23.918 | 43.194 | 7.147  |
| 60 | C  | -23.147 | 42.424 | 6.361  |
| 61 | C  | -22.149 | 43.217 | 5.825  |
| 62 | C  | -21.006 | 42.786 | 5.014  |
| 63 | N  | -20.796 | 41.52  | 4.823  |
| 64 | Cu | 26.071  | 42.603 | 8.212  |
| 65 | O  | -9.212  | 45.413 | 3.445  |
| 66 | O  | 34.209  | 29.27  | 1.492  |
| 67 | C  | 34.773  | 28.187 | 2.234  |
| 68 | C  | 33.914  | 26.948 | 2.041  |
| 69 | C  | 15.919  | 1.906  | 3.985  |
| 70 | C  | 16.968  | 2.92   | 4.417  |
| 71 | H  | -13.573 | 42.153 | 0.169  |
| 72 | H  | -15.958 | 41.274 | 0.285  |
| 73 | H  | -8.62   | 38.099 | -0.648 |
| 74 | H  | -9.331  | 40.509 | 0.075  |
| 75 | H  | -12.043 | 37.776 | 1.864  |

|     |   |         |        |        |
|-----|---|---------|--------|--------|
| 76  | H | -12.773 | 32.238 | 0.916  |
| 77  | H | -10.41  | 33.088 | 0.677  |
| 78  | H | -18.375 | 37.026 | 2.363  |
| 79  | H | -17.545 | 34.604 | 2.067  |
| 80  | H | -14.236 | 37.211 | 1.445  |
| 81  | H | -8.992  | 41.134 | 2.177  |
| 82  | H | -7.981  | 43.221 | 2.828  |
| 83  | H | -11.867 | 45.042 | 3.089  |
| 84  | H | -12.896 | 43.01  | 2.368  |
| 85  | H | -9.576  | 34.115 | -1.351 |
| 86  | H | -7.421  | 32.976 | -1.575 |
| 87  | H | -5.702  | 35.665 | 1.32   |
| 88  | H | -7.878  | 36.731 | 1.629  |
| 89  | H | -16.873 | 33.502 | -0.101 |
| 90  | H | -17.969 | 31.309 | 0.016  |
| 91  | H | -15.108 | 30.064 | 3.002  |
| 92  | H | -14.113 | 32.276 | 2.972  |
| 93  | H | -17.293 | 41.662 | 1.872  |
| 94  | H | -19.161 | 42.673 | 2.934  |
| 95  | H | -19.852 | 39.096 | 5.213  |
| 96  | H | -17.868 | 38.107 | 4.257  |
| 97  | H | -4.252  | 29.518 | 0.225  |
| 98  | H | -2.362  | 33.336 | 0.333  |
| 99  | H | -5.828  | 31.626 | -0.627 |
| 100 | H | -21.768 | 45.366 | 6.168  |
| 101 | H | -23.281 | 41.359 | 6.222  |
| 102 | H | -20.296 | 43.531 | 4.679  |
| 103 | H | 34.796  | 28.434 | 3.317  |
| 104 | H | 35.802  | 27.97  | 1.871  |
| 105 | H | 34.352  | 26.096 | 2.604  |
| 106 | H | 33.866  | 26.682 | 0.964  |
| 107 | H | 32.885  | 27.137 | 2.417  |
| 108 | H | 15.252  | 2.375  | 3.229  |
| 109 | H | 15.321  | 1.602  | 4.872  |
| 110 | H | 17.713  | 2.437  | 5.087  |
| 111 | H | 16.479  | 3.757  | 4.961  |
| 112 | H | 17.493  | 3.322  | 3.524  |

---

**Table S9.** Fractional atomic coordinates for PCOF-2(Cu<sub>3</sub>)-AB.

| <b>PCOF-2(Cu<sub>3</sub>)-AB</b>                                        |             |          |          |          |
|-------------------------------------------------------------------------|-------------|----------|----------|----------|
| <b>Space group symmetry: <i>P63</i></b>                                 |             |          |          |          |
| <b><math>a = b = 51.309 \text{ \AA}, c = 7.323 \text{ \AA}</math></b>   |             |          |          |          |
| <b><math>\alpha = \beta = 90.00^\circ, \gamma = 120.00^\circ</math></b> |             |          |          |          |
| <b>Number</b>                                                           | <b>Atom</b> | <b>x</b> | <b>y</b> | <b>z</b> |
| 1                                                                       | C           | 38.049   | 11.694   | 1.223    |
| 2                                                                       | C           | 36.786   | 11.331   | 1.165    |
| 3                                                                       | C           | 36.772   | 9.876    | 1.068    |
| 4                                                                       | N           | 38.036   | 9.402    | 1.081    |
| 5                                                                       | C           | 38.858   | 10.467   | 1.252    |
| 6                                                                       | C           | 42.279   | 7.858    | -0.301   |
| 7                                                                       | C           | 41.958   | 9.178    | -0.103   |
| 8                                                                       | C           | 40.866   | 9.205    | 0.752    |
| 9                                                                       | N           | 40.443   | 7.939    | 0.981    |
| 10                                                                      | C           | 41.317   | 7.117    | 0.36     |
| 11                                                                      | C           | 40.28    | 10.371   | 1.308    |
| 12                                                                      | C           | 38.916   | 3.103    | 0.586    |
| 13                                                                      | C           | 40.176   | 3.476    | 0.513    |
| 14                                                                      | C           | 40.184   | 4.932    | 0.583    |
| 15                                                                      | N           | 38.925   | 5.401    | 0.701    |
| 16                                                                      | C           | 38.117   | 4.318    | 0.79     |
| 17                                                                      | C           | 41.341   | 5.72     | 0.488    |
| 18                                                                      | C           | 34.632   | 7.085    | -0.163   |
| 19                                                                      | C           | 34.95    | 5.749    | -0.145   |
| 20                                                                      | C           | 36.076   | 5.614    | 0.651    |
| 21                                                                      | N           | 36.514   | 6.841    | 1.025    |
| 22                                                                      | C           | 35.618   | 7.738    | 0.557    |
| 23                                                                      | C           | 35.608   | 9.113    | 0.858    |
| 24                                                                      | C           | 36.711   | 4.391    | 0.984    |
| 25                                                                      | C           | 42.626   | 5.079    | 0.832    |
| 26                                                                      | C           | 41.165   | 11.521   | 1.805    |
| 27                                                                      | C           | 34.308   | 9.762    | 1.141    |
| 28                                                                      | C           | 35.906   | 3.178    | 1.454    |
| 29                                                                      | C           | 42.583   | 11.458   | 1.759    |
| 30                                                                      | C           | 43.369   | 12.595   | 1.973    |
| 31                                                                      | C           | 42.774   | 13.815   | 2.284    |
| 32                                                                      | C           | 41.404   | 13.831   | 2.587    |
| 33                                                                      | C           | 40.633   | 12.675   | 2.426    |

|    |    |        |        |        |
|----|----|--------|--------|--------|
| 34 | C  | 42.838 | 4.731  | 2.174  |
| 35 | C  | 44.014 | 4.099  | 2.559  |
| 36 | C  | 45.008 | 3.82   | 1.612  |
| 37 | C  | 44.815 | 4.19   | 0.272  |
| 38 | C  | 43.615 | 4.799  | -0.124 |
| 39 | C  | 34.492 | 3.13   | 1.412  |
| 40 | C  | 33.793 | 1.952  | 1.694  |
| 41 | C  | 34.468 | 0.796  | 2.076  |
| 42 | C  | 35.847 | 0.882  | 2.323  |
| 43 | C  | 36.535 | 2.074  | 2.077  |
| 44 | C  | 33.997 | 10.055 | 2.477  |
| 45 | C  | 32.808 | 10.704 | 2.798  |
| 46 | C  | 31.894 | 11.044 | 1.792  |
| 47 | C  | 32.183 | 10.724 | 0.457  |
| 48 | C  | 33.401 | 10.112 | 0.127  |
| 49 | C  | 47.72  | 0.316  | 3.717  |
| 50 | N  | 48.956 | 0.269  | 4.242  |
| 51 | N  | 49.494 | 1.476  | 4.197  |
| 52 | C  | 48.623 | 2.323  | 3.621  |
| 53 | C  | 47.488 | 1.608  | 3.291  |
| 54 | C  | 46.233 | 2.137  | 2.772  |
| 55 | N  | 46.227 | 3.193  | 2.018  |
| 56 | Cu | 51.053 | 1.992  | 5.232  |
| 57 | C  | 29.158 | 14.556 | 3.869  |
| 58 | N  | 27.984 | 14.567 | 4.521  |
| 59 | N  | 27.453 | 13.356 | 4.476  |
| 60 | C  | 28.268 | 12.549 | 3.774  |
| 61 | C  | 29.367 | 13.286 | 3.371  |
| 62 | C  | 30.625 | 12.771 | 2.83   |
| 63 | N  | 30.656 | 11.672 | 2.141  |
| 64 | Cu | 25.925 | 12.789 | 5.559  |
| 65 | O  | 43.559 | 14.953 | 2.284  |
| 66 | O  | 33.736 | -0.371 | 2.216  |
| 67 | C  | 34.355 | -1.612 | 2.418  |
| 68 | C  | 33.303 | -2.705 | 2.431  |
| 69 | C  | 42.988 | 16.208 | 2.033  |
| 70 | C  | 44.086 | 17.219 | 1.745  |
| 71 | H  | 38.372 | 12.717 | 1.104  |
| 72 | H  | 35.946 | 12.006 | 1.062  |
| 73 | H  | 43.109 | 7.487  | -0.887 |
| 74 | H  | 42.472 | 10.023 | -0.543 |
| 75 | H  | 39.705 | 7.647  | 1.658  |

|     |   |        |        |        |
|-----|---|--------|--------|--------|
| 76  | H | 38.572 | 2.093  | 0.417  |
| 77  | H | 41.015 | 2.82   | 0.321  |
| 78  | H | 33.793 | 7.524  | -0.685 |
| 79  | H | 34.43  | 4.976  | -0.694 |
| 80  | H | 37.294 | 7.04   | 1.69   |
| 81  | H | 43.115 | 10.543 | 1.568  |
| 82  | H | 44.442 | 12.537 | 1.838  |
| 83  | H | 40.931 | 14.726 | 2.967  |
| 84  | H | 39.636 | 12.7   | 2.83   |
| 85  | H | 42.086 | 4.948  | 2.924  |
| 86  | H | 44.158 | 3.84   | 3.601  |
| 87  | H | 45.579 | 3.978  | -0.464 |
| 88  | H | 43.456 | 5.042  | -1.167 |
| 89  | H | 33.888 | 3.989  | 1.193  |
| 90  | H | 32.715 | 1.934  | 1.592  |
| 91  | H | 36.398 | 0.041  | 2.717  |
| 92  | H | 37.559 | 2.12   | 2.409  |
| 93  | H | 34.681 | 9.783  | 3.272  |
| 94  | H | 32.589 | 10.928 | 3.835  |
| 95  | H | 31.48  | 10.976 | -0.327 |
| 96  | H | 33.637 | 9.915  | -0.911 |
| 97  | H | 47.023 | -0.512 | 3.7    |
| 98  | H | 48.766 | 3.394  | 3.541  |
| 99  | H | 45.307 | 1.634  | 3.028  |
| 100 | H | 29.844 | 15.391 | 3.828  |
| 101 | H | 28.133 | 11.48  | 3.672  |
| 102 | H | 31.544 | 13.299 | 3.063  |
| 103 | H | 34.884 | -1.621 | 3.387  |
| 104 | H | 35.085 | -1.817 | 1.609  |
| 105 | H | 33.795 | -3.694 | 2.51   |
| 106 | H | 32.709 | -2.676 | 1.494  |
| 107 | H | 32.626 | -2.567 | 3.3    |
| 108 | H | 42.324 | 16.155 | 1.146  |
| 109 | H | 42.399 | 16.543 | 2.912  |
| 110 | H | 44.752 | 16.846 | 0.941  |
| 111 | H | 44.684 | 17.402 | 2.655  |
| 112 | H | 43.634 | 18.176 | 1.42   |

---

**Table S10.** Fractional atomic coordinates for PCOF-2(Cu<sub>3</sub>)-ABC.

| <b>PCOF-2(Cu<sub>3</sub>)-ABC</b>                                       |             |          |          |          |
|-------------------------------------------------------------------------|-------------|----------|----------|----------|
| <b>Space group symmetry: <i>R</i>-3</b>                                 |             |          |          |          |
| <b><math>a = b = 53.903 \text{ \AA}, c = 6.953 \text{ \AA}</math></b>   |             |          |          |          |
| <b><math>\alpha = \beta = 90.00^\circ, \gamma = 120.00^\circ</math></b> |             |          |          |          |
| <b>Number</b>                                                           | <b>Atom</b> | <b>x</b> | <b>y</b> | <b>z</b> |
| 1                                                                       | C           | -12.001  | 35.972   | -0.295   |
| 2                                                                       | C           | -10.926  | 36.122   | 0.527    |
| 3                                                                       | C           | -11.249  | 37.119   | 1.435    |
| 4                                                                       | N           | -12.468  | 37.634   | 1.141    |
| 5                                                                       | C           | -12.929  | 36.936   | 0.073    |
| 6                                                                       | C           | -16.822  | 39.554   | -0.148   |
| 7                                                                       | C           | -16.137  | 38.624   | -0.876   |
| 8                                                                       | C           | -15.111  | 38.113   | -0.093   |
| 9                                                                       | N           | -15.12   | 38.765   | 1.184    |
| 10                                                                      | C           | -16.237  | 39.66    | 1.108    |
| 11                                                                      | C           | -14.193  | 37.132   | -0.548   |
| 12                                                                      | C           | -16.624  | 40.631   | 2.068    |
| 13                                                                      | C           | -17.827  | 41.34    | 1.836    |
| 14                                                                      | C           | -14.564  | 36.345   | -1.677   |
| 15                                                                      | C           | -13.698  | 36.168   | -2.773   |
| 16                                                                      | C           | -14.071  | 35.374   | -3.859   |
| 17                                                                      | C           | -15.332  | 34.781   | -3.911   |
| 18                                                                      | C           | -16.222  | 34.976   | -2.838   |
| 19                                                                      | C           | -15.838  | 35.742   | -1.734   |
| 20                                                                      | C           | -17.819  | 42.734   | 1.646    |
| 21                                                                      | C           | -19.01   | 43.43    | 1.42     |
| 22                                                                      | C           | -20.237  | 42.739   | 1.361    |
| 23                                                                      | C           | -20.239  | 41.347   | 1.509    |
| 24                                                                      | C           | -19.049  | 40.651   | 1.734    |
| 25                                                                      | C           | -23.405  | 46.535   | 1.312    |
| 26                                                                      | N           | -24.704  | 46.604   | 1.652    |
| 27                                                                      | N           | -25.205  | 45.379   | 1.671    |
| 28                                                                      | C           | -24.233  | 44.507   | 1.353    |
| 29                                                                      | C           | -23.072  | 45.213   | 1.108    |
| 30                                                                      | C           | -21.71   | 44.673   | 1.037    |
| 31                                                                      | N           | -21.506  | 43.406   | 1.24     |
| 32                                                                      | Cu          | 27.318   | 44.865   | 2.663    |
| 33                                                                      | O           | -15.647  | 34.033   | -5       |

|    |   |         |        |        |
|----|---|---------|--------|--------|
| 34 | C | 16.839  | -2.12  | 9.805  |
| 35 | C | 16.796  | -1.369 | 11.125 |
| 36 | H | -12.079 | 35.209 | -1.054 |
| 37 | H | -10.023 | 35.53  | 0.473  |
| 38 | H | -17.637 | 40.148 | -0.543 |
| 39 | H | -16.347 | 38.386 | -1.911 |
| 40 | H | -12.734 | 36.65  | -2.795 |
| 41 | H | -13.372 | 35.216 | -4.668 |
| 42 | H | -17.208 | 34.53  | -2.839 |
| 43 | H | -16.533 | 35.846 | -0.909 |
| 44 | H | -16.886 | 43.286 | 1.669  |
| 45 | H | -18.954 | 44.502 | 1.314  |
| 46 | H | -21.173 | 40.801 | 1.469  |
| 47 | H | -19.084 | 39.575 | 1.86   |
| 48 | H | -22.713 | 47.363 | 1.387  |
| 49 | H | -24.324 | 43.433 | 1.456  |
| 50 | H | -20.894 | 45.368 | 0.908  |
| 51 | H | 16.999  | -1.389 | 8.982  |
| 52 | H | 17.679  | -2.848 | 9.829  |
| 53 | H | 15.973  | -0.624 | 11.109 |
| 54 | H | 17.762  | -0.847 | 11.289 |
| 55 | H | 16.628  | -2.075 | 11.962 |
| 56 | H | -14.665 | 38.42  | 2.056  |

---

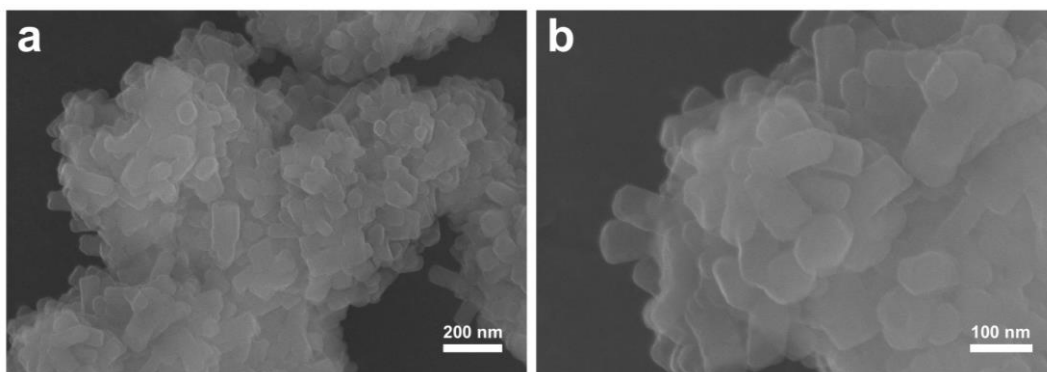

**Figure S21.** SEM images of Pd-PCOF-1(Cu<sub>3</sub>).

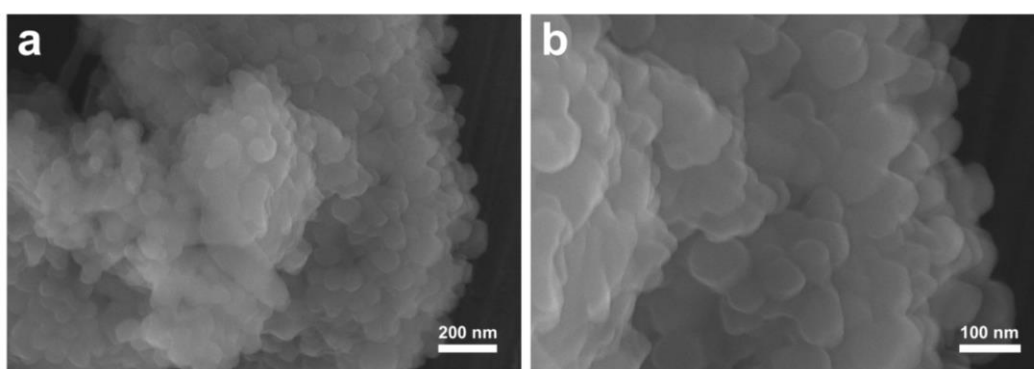

**Figure S22.** SEM images of Pd-PCOF-2(Cu<sub>3</sub>).

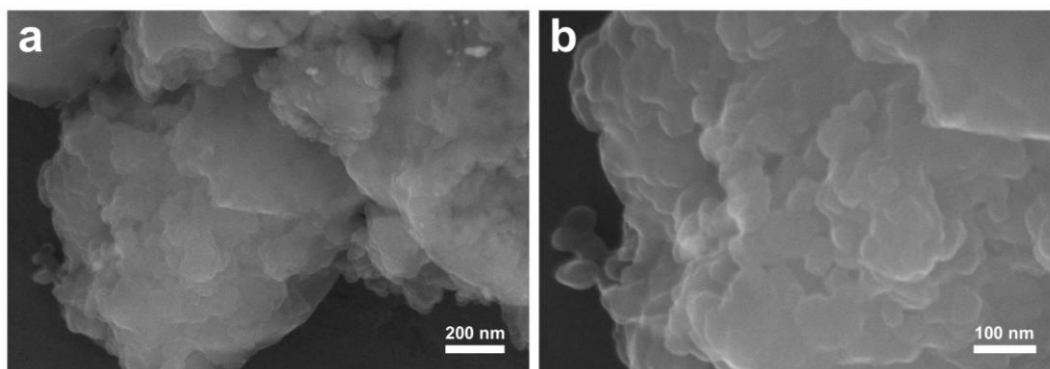

**Figure S23.** SEM images of PCOF-2(Cu<sub>3</sub>).

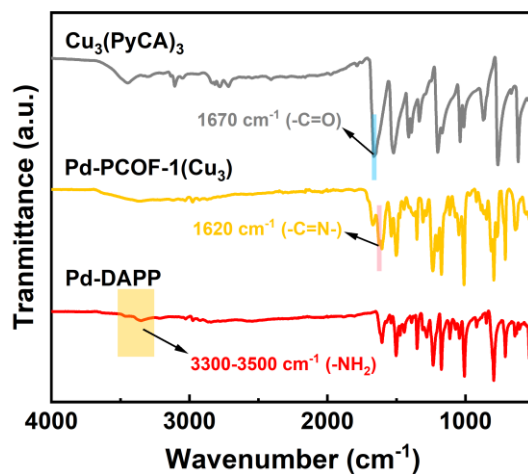

**Figure S24.** FT-IR spectra of Pd-PCOF-1(Cu<sub>3</sub>), Cu<sub>3</sub>(PyCA)<sub>3</sub> and Pd-DAPP.

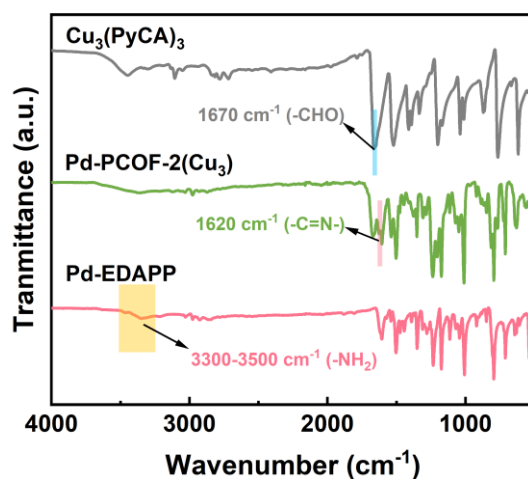

**Figure S25.** FT-IR spectra of Pd-PCOF-2(Cu<sub>3</sub>), Cu<sub>3</sub>(PyCA)<sub>3</sub> and Pd-EDAPP.

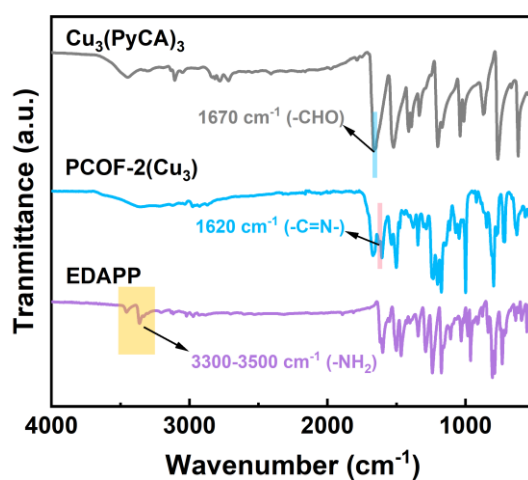

**Figure S26.** FT-IR spectra of PCOF-2(Cu<sub>3</sub>), Cu<sub>3</sub>(PyCA)<sub>3</sub> and EDAPP.

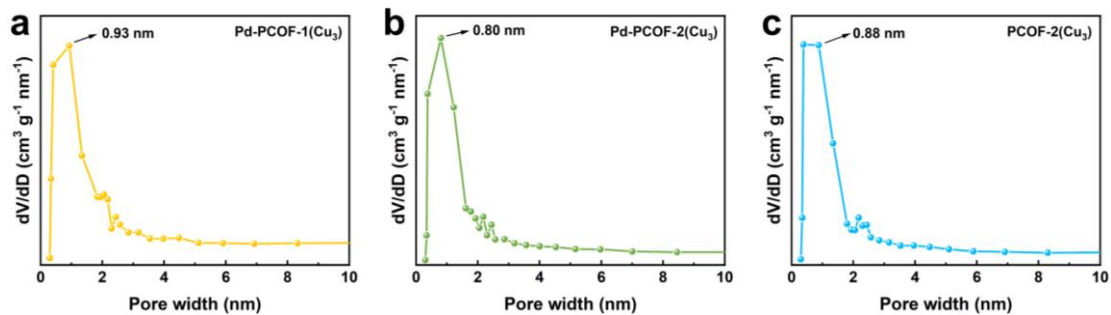

**Figure S27.** Pore size distribution profiles of Pd-PCOF-1( $\text{Cu}_3$ ) (a), Pd-PCOF-2( $\text{Cu}_3$ ) (b) and PCOF-2( $\text{Cu}_3$ ) (c) calculated by Nonlocal Density Functional Theory (NLDFT) modeling based on  $\text{N}_2$  adsorption data.

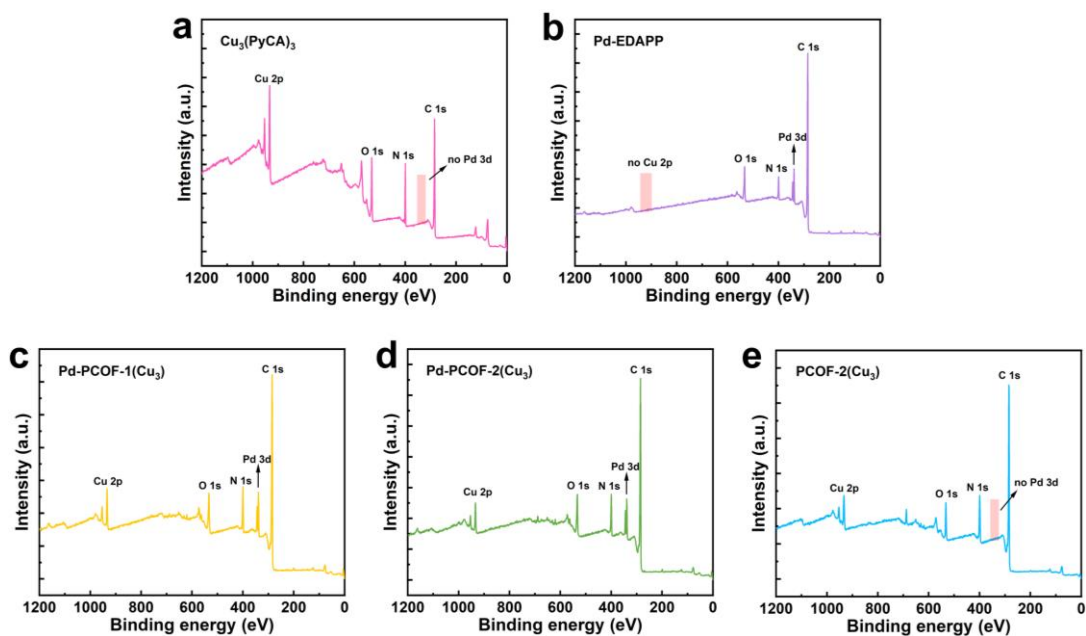

**Figure S28.** Survey scan XPS profiles of  $\text{Cu}_3(\text{PyCA})_3$  (a), Pd-EDAPP (b), Pd-PCOF-1( $\text{Cu}_3$ ) (c), Pd-PCOF-2( $\text{Cu}_3$ ) (d) and PCOF-2( $\text{Cu}_3$ ) (e).

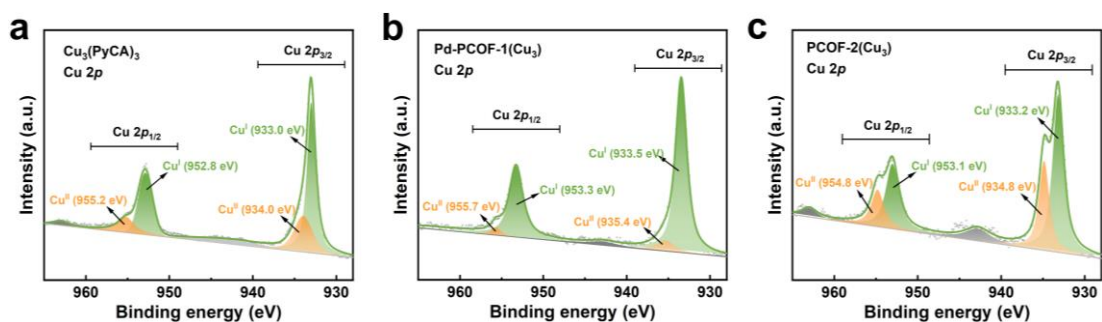

**Figure S29.** High-resolution Cu 2p XPS profiles of  $\text{Cu}_3(\text{PyCA})_3$  (a), Pd-PCOF-1( $\text{Cu}_3$ ) (b), Pd-PCOF-2( $\text{Cu}_3$ ) (c) and PCOF-2( $\text{Cu}_3$ ) (d).

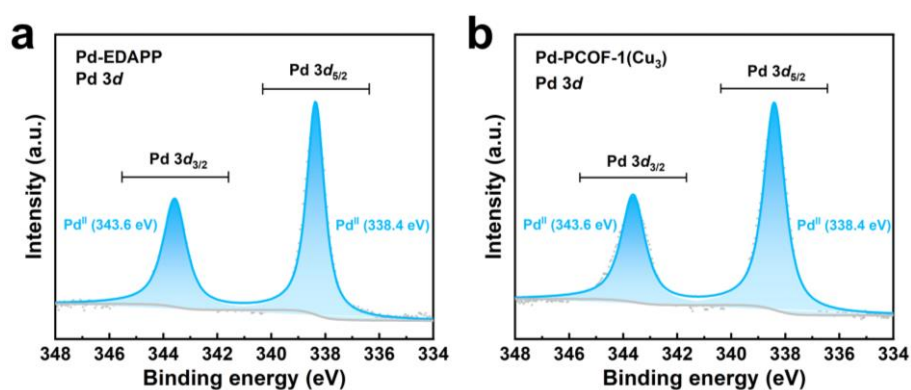

**Figure S30.** High-resolution Pd 3d XPS profiles of Pd-EDAPP(a), Pd-PCOF-1( $\text{Cu}_3$ ) (b) and Pd-PCOF-2( $\text{Cu}_3$ ) (c).

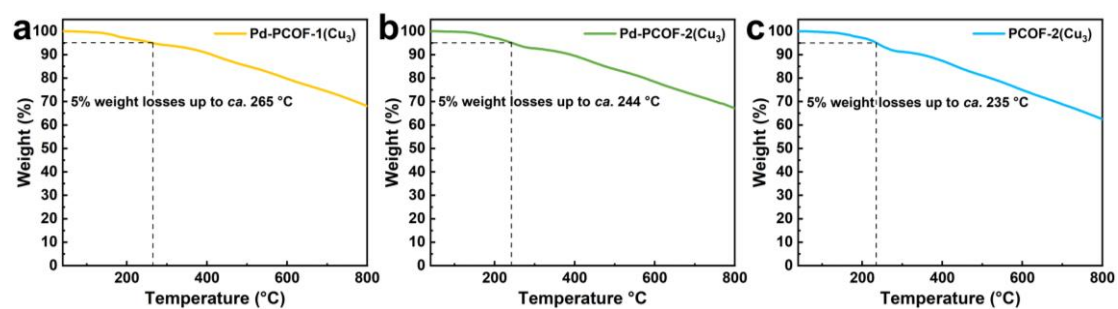

**Figure S31.** TGA curves of Pd-PCOF-1( $\text{Cu}_3$ ) (a), Pd-PCOF-2( $\text{Cu}_3$ ) (b) and PCOF-2( $\text{Cu}_3$ ) (c) under  $\text{N}_2$  atmosphere.

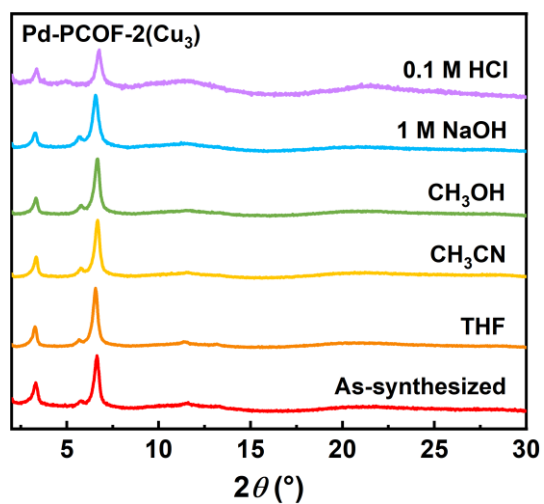

**Figure S32.** PXRD patterns of Pd-PCOF-2(Cu<sub>3</sub>) after treatment with various solvents for 24 h.

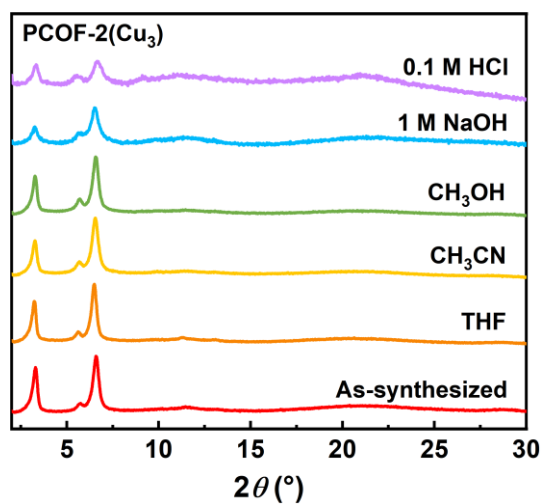

**Figure S33.** PXRD patterns of PCOF-2(Cu<sub>3</sub>) after treatment with various solvents for 24 h.

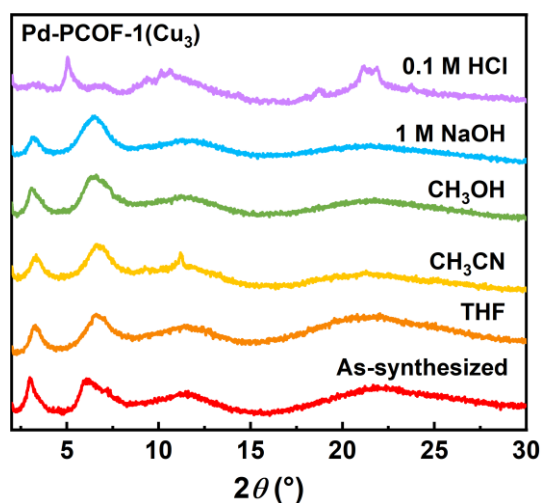

**Figure S34.** PXRD patterns of Pd-PCOF-1(Cu<sub>3</sub>) after treatment with various solvents for 24 h.

## **4. Electrocatalytic performances**

### **4.1 Determination of product**

#### **4.1.1 Determination of NH<sub>3</sub> by <sup>1</sup>H NMR measurement**

After chronoamperometry test at a specific potential for 1000 s, 500  $\mu\text{L}$  of the reaction electrolyte was collected and mixed with 500  $\mu\text{L}$  of 2 mM maleic acid (dissolved in 1.5 M HCl) and 100  $\mu\text{L}$  of DMSO-*d*<sub>6</sub>. Subsequently, 600  $\mu\text{L}$  of the mixture solution was used for <sup>1</sup>H NMR test on an NMR spectrometer (Bruker AVANCE III 400 MHz). The ammonia concentration was calculated by the corresponding standard curve, which was obtained by using a series of standard NH<sub>4</sub>Cl solutions (2, 4, 6, 8 and 10 mM) in the same operation.

#### **4.1.2 Determination of NH<sub>3</sub> by UV-Vis spectrophotometric measurement**

The ammonia concentration can also be measured through the indophenol blue method. Firstly, solution A (1 M KOH containing 5 wt% salicylic acid and 5 wt% sodium citrate), solution B (50 mM NaClO) and solution C (1 wt% sodium nitroferricyanide solution) were prepared. Subsequently, 2 mL of the reaction electrolyte (diluted to a certain multiple) was mixed with 2 mL of solution A, 1 mL of solution B and 200  $\mu\text{L}$  of solution C sequentially. After sitting for 2 h, the mixed solution was tested by UV-Vis spectrophotometer (UV-3600, Shimadzu) to obtain the absorption spectra (500 ~ 800 nm). According to the absorbance recorded at the wavelength of 655 nm, the ammonia concentration was calculated by the corresponding concentration-absorbance curve, which was obtained by using a series of standard NH<sub>4</sub>Cl solutions (0, 0.1, 0.2, 0.3 and 0.4 mM) in the same operation.

#### **4.1.3 Determination of NO<sub>2</sub><sup>-</sup> by spectrophotometric measurement**

The NO<sub>2</sub><sup>-</sup> concentration was measured using the Griess test. Firstly, the Griess reagent was prepared by dissolving 400 mg of *p*-aminobenzene sulfonamide, 20 mg of N-(1-naphthyl) ethyldiamine dihydrochloride and 1 mL of phosphoric acid (85%) in 5 mL of deionized H<sub>2</sub>O. Subsequently, 5 mL of the reaction electrolyte (diluted to a certain multiple) was mixed with 100  $\mu\text{L}$  of the Griess reagent. After sitting for 0.5 h, the mixed solution was tested by UV-Vis spectrophotometer (UV-3600, Shimadzu) to obtain the absorption spectra (430 ~ 650 nm). According to the absorbance recorded at the wavelength of 540 nm, the ammonia concentration

was calculated by the corresponding concentration-absorbance curve, which was obtained by using a series of standard  $\text{KNO}_2$  solutions (0, 2, 5, 10, 20, 30, 40 and 50  $\mu\text{M}$ ) in the same operation.

#### 4.1.4 Determination of $\text{H}_2$ by gas chromatographic method

The  $\text{H}_2$  product was collected and detected through on-line gas chromatograph (FULI INSTRUMENTS GC9790Plus) equipped with thermal conductivity detector (TCD).

#### 4.2 Calculation of products ( $\text{NH}_3$ , $\text{NO}_2^-$ and $\text{H}_2$ ) Faradaic efficiency (FE) and $\text{NH}_3$ yield

Faradaic efficiency of  $\text{NH}_3$  and  $\text{NO}_2^-$  was calculated using the following equation:

$$FE = \frac{n \times c \times V \times F}{Q} \times 100\%$$

where  $n$  is the number of electrons transferred ( $n = 8$  for  $\text{NH}_3$ ,  $n = 2$  for  $\text{NO}_2^-$ ),  $c$  is the concentration of  $\text{NH}_3$  or  $\text{NO}_2^-$  in the catholyte,  $V$  is the volume of the catholyte (60 mL),  $F$  is the Faraday constant ( $96485 \text{ C mol}^{-1}$ ), and  $Q$  is the total charge passing the working electrode.

Faradaic efficiency of  $\text{H}_2$  was calculated using the standard calculation table of gas chromatograph.

$\text{NH}_3$  yield was calculated using the following equation:

$$Yield(\text{NH}_3) = \frac{c \times V}{S \times t}$$

where  $c$  is the concentration of  $\text{NH}_3$  in the catholyte,  $V$  is the volume of the catholyte (60 mL),  $S$  is the geometric surface area of the electrode ( $1 \text{ cm}^2$ ), and  $t$  is the electrolysis time ( $1000 \text{ s} = 1/3.6 \text{ h}$ ).

#### 4.3 $^{15}\text{N}$ isotope labeling experiments

To elucidate the origin of ammonia product,  $\text{K}^{15}\text{NO}_3$  (99 atom %  $^{15}\text{N}$ ) was employed as the nitrogen source. After chronoamperometry test at  $-0.9 \text{ V}$  for 1000 s in 60 mL 1 M KOH solution containing 1.0 g  $\text{K}^{15}\text{NO}_3$  (0.082 M), 500  $\mu\text{L}$  of the reaction electrolyte was collected and mixed with 500  $\mu\text{L}$  of 2 mM maleic acid (dissolved in 1.5 M HCl) and 100  $\mu\text{L}$  of  $\text{DMSO-}d_6$ . Subsequently, 600  $\mu\text{L}$  of the mixture solution was used for  $^1\text{H}$  NMR test on an NMR spectrometer (Bruker AVANCE III 400 MHz). The corresponding standard curve of  $^{15}\text{NH}_4^+$  was obtained by using a series of standard  $^{15}\text{NH}_4\text{Cl}$  solutions (2, 4, 6, 8 and 10 mM) in the same operation.

#### 4.4 Calculation of electrochemically active surface area (ECSA)

The electrochemical active surface area (ECSA) was determined by analyzing the double-layer capacitance ( $C_{dl}$ ) from cyclic voltammetry (CV) measurements conducted at scan rates of 10, 20, 30, 40, and 50  $\text{mV s}^{-1}$  within a non-Faradaic potential range from 0.6 to 0.7 V. The ECSA of the working electrode was calculated using the following formula:

$$C_{dl} = \frac{\Delta j}{\nu}$$

$$ECSA = \frac{C_{dl}}{C_s}$$

where  $\Delta j = (j_a - j_c)/2$  at 0.65 V against the scan rates,  $\nu$  is the scan rate,  $C_{dl}$  is the double layer capacitance, and  $C_s$  is the specific capacitance of the material ( $C_s$  is taken as 40  $\mu\text{F cm}^{-2}$  in this study).

#### 4.5 Calculation of $H^*$ values

The quantitative comparison of  $H^*$  values among different catalysts or electrolytes were obtained through cyclic voltammetry (CV) measurements and calculated via the equations below [21].

$$Q_{H^*} = S_{\text{integrated area}} \times \frac{\Delta U}{\nu} \times S_{\text{geometric area}}$$

Wherein, the  $S_{\text{integrated area}}$  was obtained from the CV plot,  $\Delta U$  represents the potential window of the  $H^*$  desorption peaks, the  $\nu$  scan rate was 50  $\text{mV s}^{-1}$ , and the geometric area of all the working electrodes was 1  $\text{cm}^2$ .

#### 4.6. In situ ATR-FTIR spectra

In situ electrochemical Fourier-transform infrared spectroscopy (ATR-FTIR) measurements were performed on Bruke INVENIO S and an MCT detector. The working electrode was a hemispherical silicon prism coated with a gold layer to enhance the infrared signal, with the Pd-PCOF-3( $\text{Cu}_3$ ) drop-cast onto its surface. During the experiment, a three-electrode electrochemical cell was used, with a platinum wire as the counter electrode and a Hg/HgO (with 1 M KOH solution) electrode as the reference. The electrolyte was 1 M KOH, continuously saturated with high-purity Ar gas by bubbling during the measurements. The applied potential was scanned at OCP, -0.6 V, -0.7 V, -0.8 V, -0.9 V, -1.0 V, -1.1 V vs RHE.

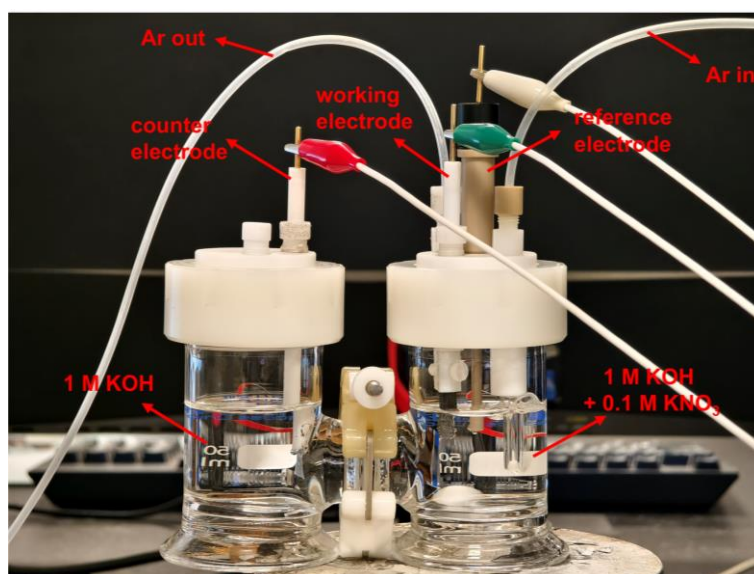

**Figure S35.** Three-electrode H-type electrolytic cell for NO<sub>3</sub>RR.

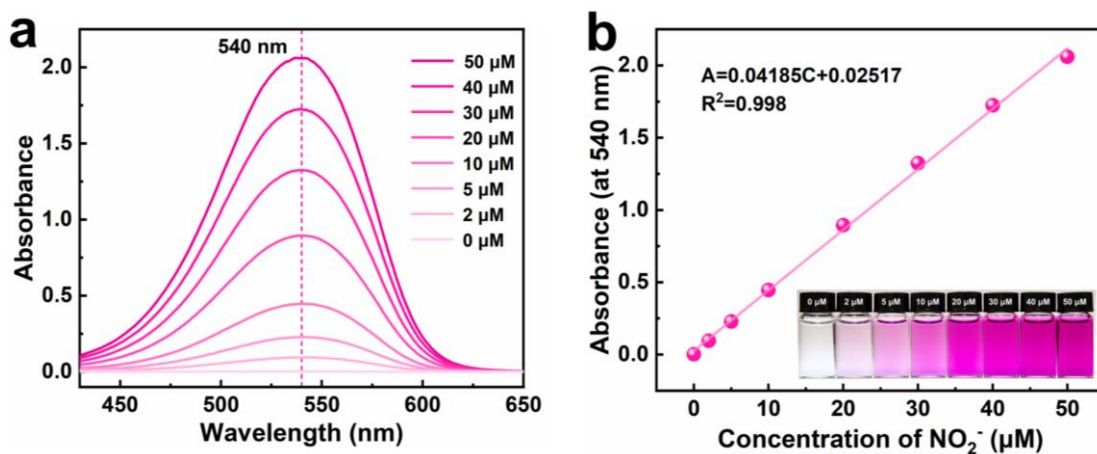

**Figure S36.** UV-vis absorption spectra of a series of standard  $\text{KNO}_2$  solutions (a) and corresponding calibration curve used for the calculation of  $\text{NO}_2^-$  concentration (b). The inset is the photograph of the  $\text{KNO}_2$  solution after chromogenic reaction.

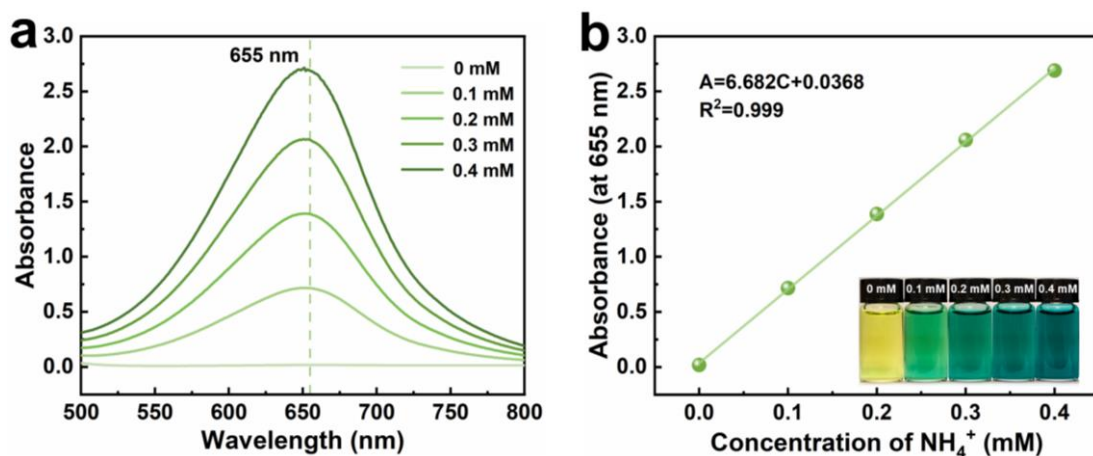

**Figure S37.** UV-vis absorption spectra of a series of standard  $\text{NH}_4\text{Cl}$  solutions (a) and corresponding calibration curve used for the calculation of  $\text{NH}_3$  concentration (b). The inset is the photograph of the  $\text{NH}_4\text{Cl}$  solution after chromogenic reaction.

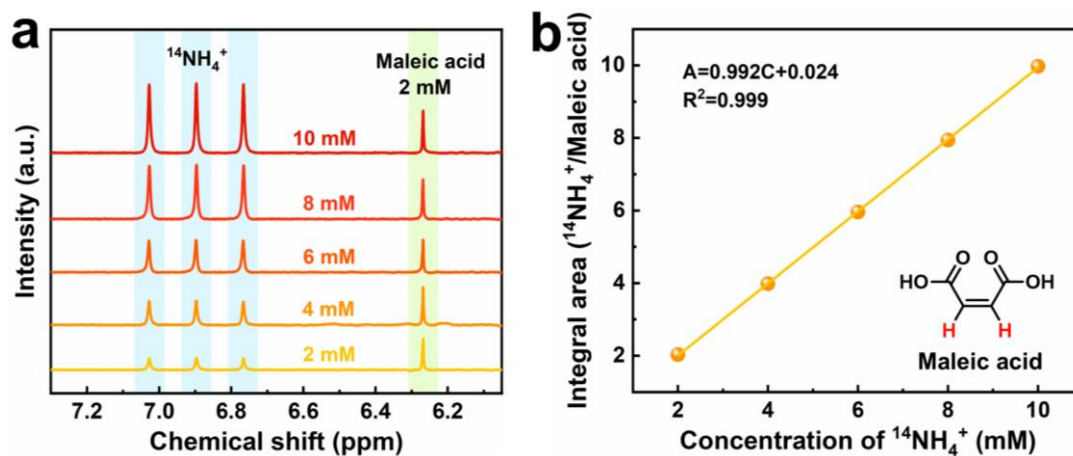

**Figure S38.**  $^1\text{H}$  NMR spectra of  $^{14}\text{NH}_4^+$  ions at different concentrations with 2 mM maleic acid as internal standard (a) and corresponding calibration curve used for the calculation of  $^{14}\text{NH}_4^+$  concentration (b). The inset is the chemical construction of maleic acid.

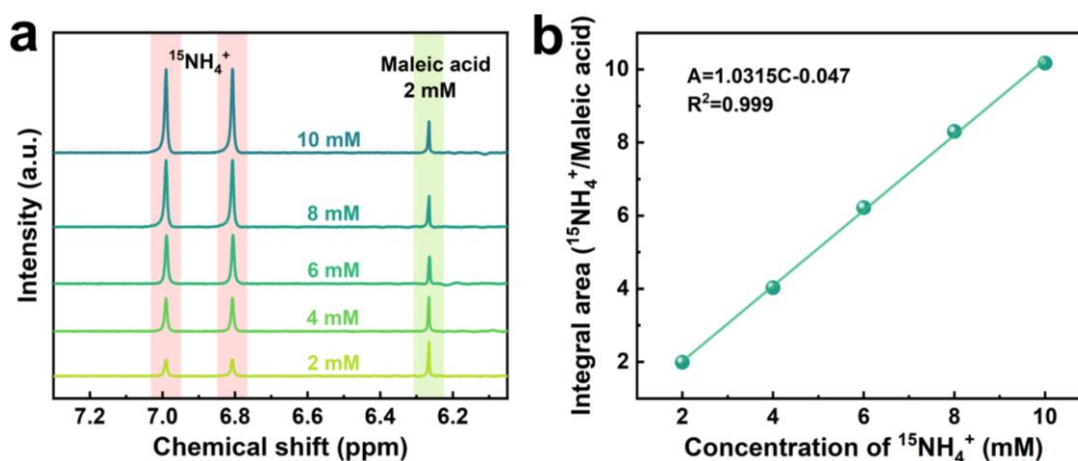

**Figure S39.**  $^1\text{H}$  NMR spectra of  $^{15}\text{NH}_4^+$  ions at different concentrations with 2 mM maleic acid as internal standard (a) and corresponding calibration curve used for the calculation of  $^{15}\text{NH}_4^+$  concentration (b).

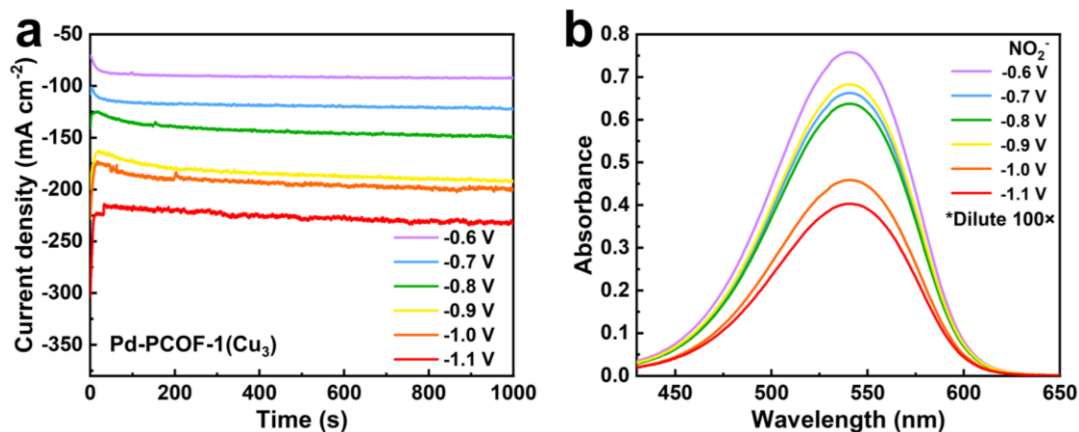

**Figure S40.** Chronoamperometry curve of Pd-PCOF-1(Cu<sub>3</sub>) for NO<sub>3</sub>RR at different applied potentials (a). UV-vis absorption spectra of NO<sub>2</sub><sup>-</sup> after chromogenic reaction (b).

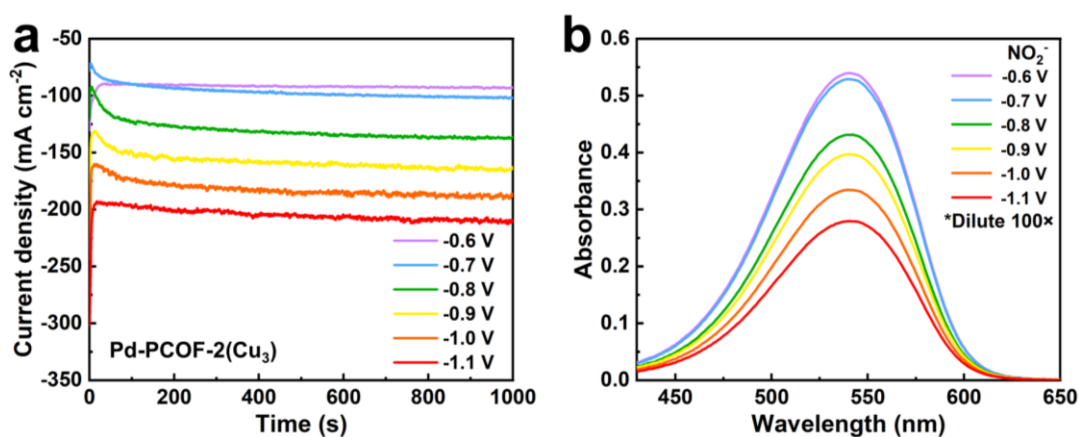

**Figure S41.** Chronoamperometry curve of Pd-PCOF-2(Cu<sub>3</sub>) for NO<sub>3</sub>RR at different applied potentials (a). UV-vis absorption spectra of NO<sub>2</sub><sup>-</sup> after chromogenic reaction (b).

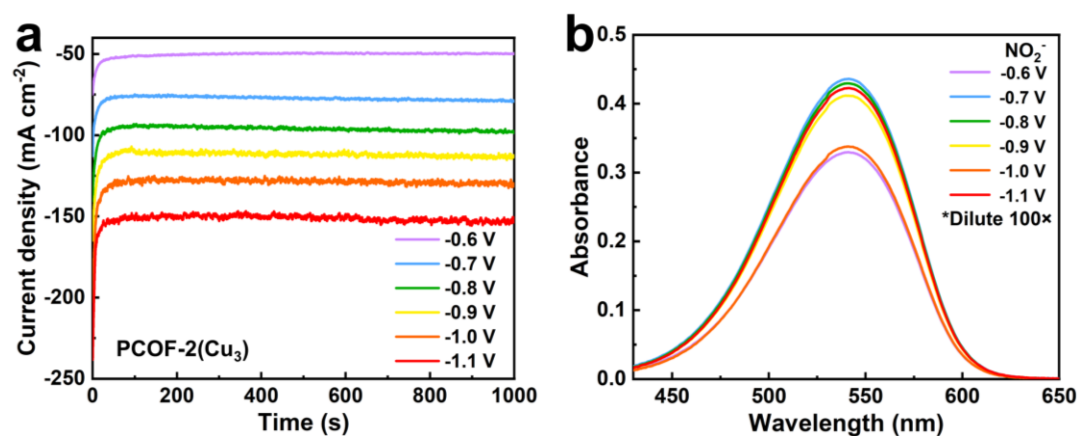

**Figure S42.** Chronoamperometry curve of PCOF-2(Cu<sub>3</sub>) for NO<sub>3</sub>RR at different applied potentials (a). UV-vis absorption spectra of NO<sub>2</sub><sup>-</sup> after chromogenic reaction (b).

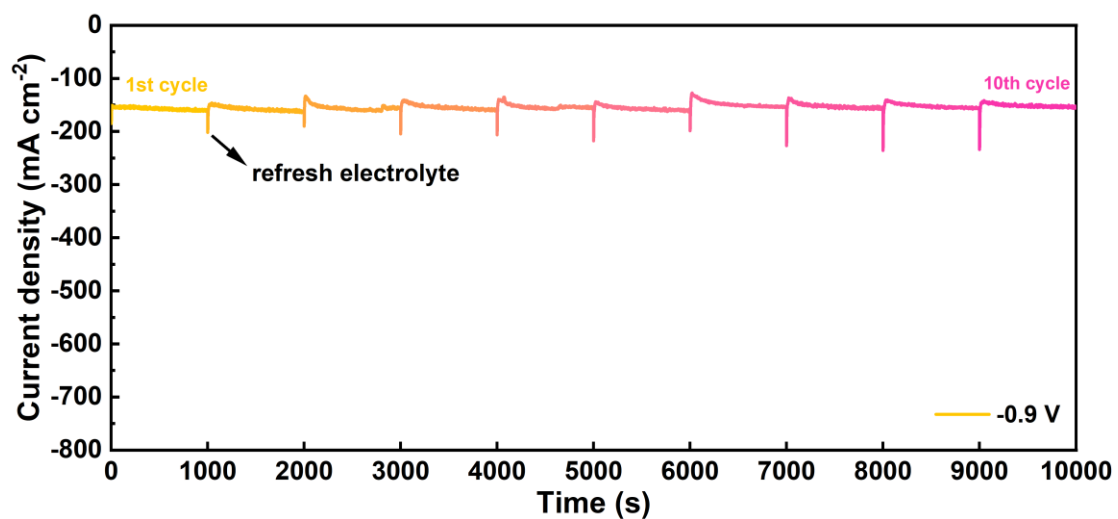

**Figure S43.** The current density curve of Pd-PCOF-2(Cu<sub>3</sub>) for continuous cyclic electrolysis at -0.9 V vs. RHE.

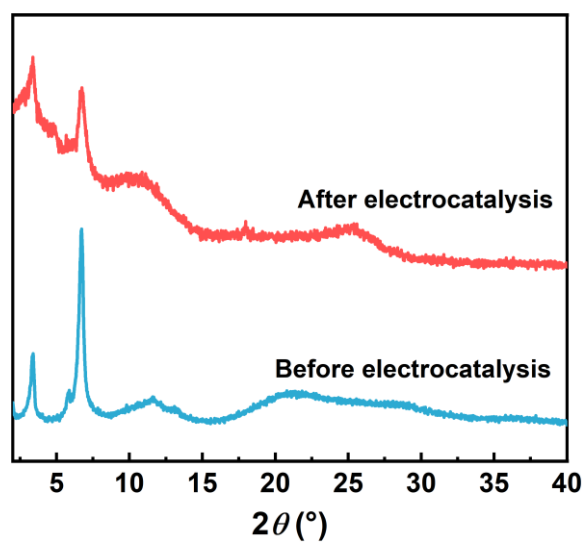

**Figure S44.** PXRD patterns of Pd-PCOF-2(Cu<sub>3</sub>) before and after electrocatalysis 10 consecutive cycles.

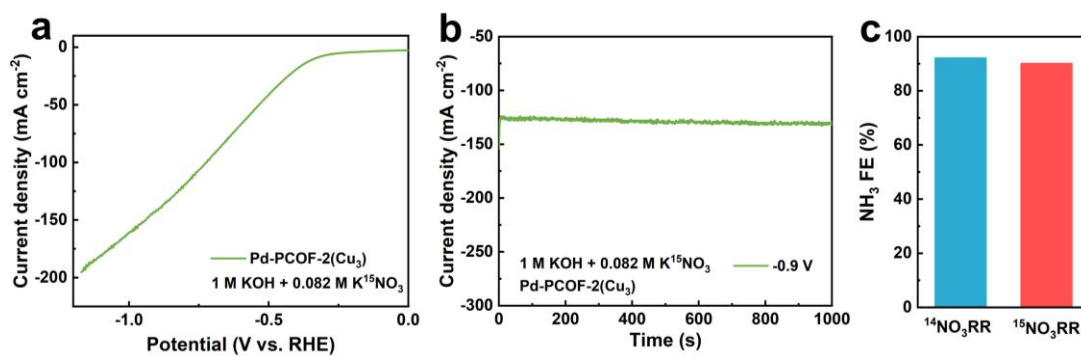

**Figure S45.** LSV curve at a scan rate of 10 mV s<sup>-1</sup> (a) and chronoamperometry curve at -0.9 V vs. RHE (b) of Pd-PCOF-2(Cu<sub>3</sub>) in 1 M KOH with 0.082 M K<sup>15</sup>NO<sub>3</sub>. The NH<sub>3</sub> FE of Pd-PCOF-2(Cu<sub>3</sub>) after electrolysis using <sup>14</sup>NO<sub>3</sub><sup>-</sup> or <sup>15</sup>NO<sub>3</sub><sup>-</sup> as nitrogen resources at -0.9 V vs. RHE (c).

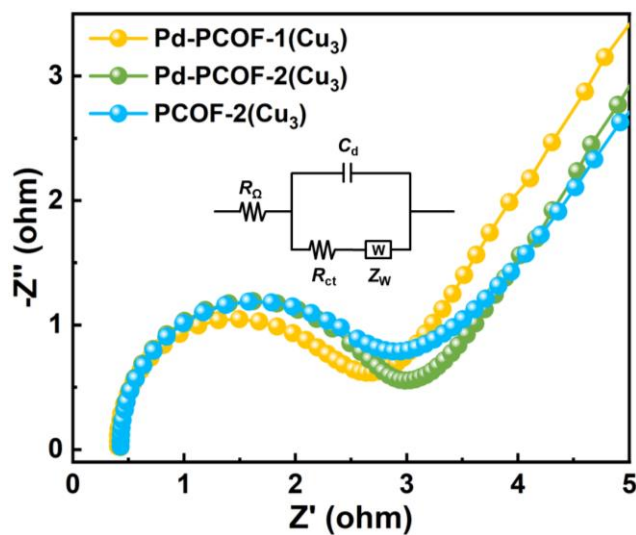

**Figure S46.** Nyquist plots of Pd-PCOF-1(Cu<sub>3</sub>), Pd-PCOF-2(Cu<sub>3</sub>) and PCOF-2(Cu<sub>3</sub>) in 1 M KOH and containing 0.1 M KNO<sub>3</sub>.

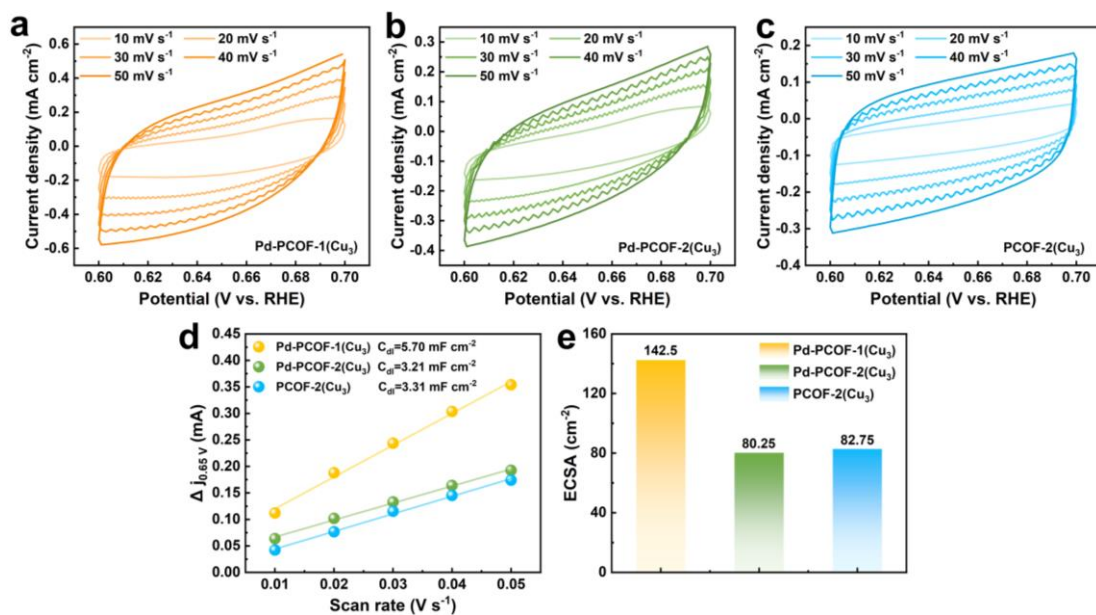

**Figure S47.** CV curves of Pd-PCOF-1(Cu<sub>3</sub>) (a), Pd-PCOF-2(Cu<sub>3</sub>) (b) and PCOF-2(Cu<sub>3</sub>) (c) at different scan rates. CV current density versus scan rate (the liner slope is equivalent to the  $C_{dl}$ ) (d). The ECSA comparison of Pd-PCOF-1(Cu<sub>3</sub>), Pd-PCOF-2(Cu<sub>3</sub>) and PCOF-2(Cu<sub>3</sub>) (e).

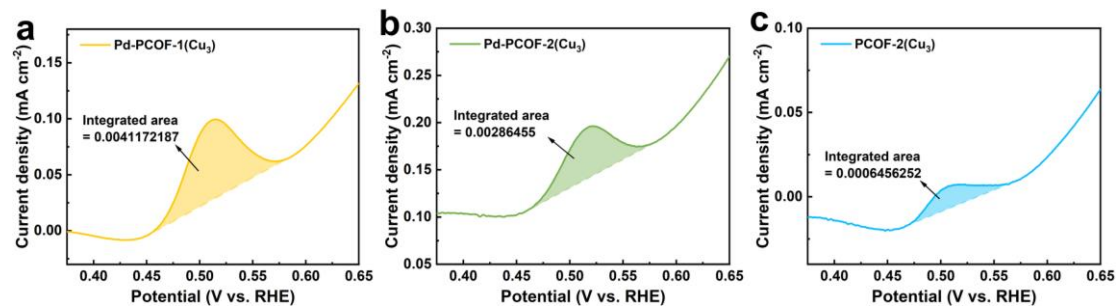

**Figure S48.** The integrated area of  $H_{ads}^*$  from the peak of the CV curves over Pd-PCOF-1(Cu<sub>3</sub>) (a), Pd-PCOF-2(Cu<sub>3</sub>) (b) and PCOF-2(Cu<sub>3</sub>) in 1 M KOH.

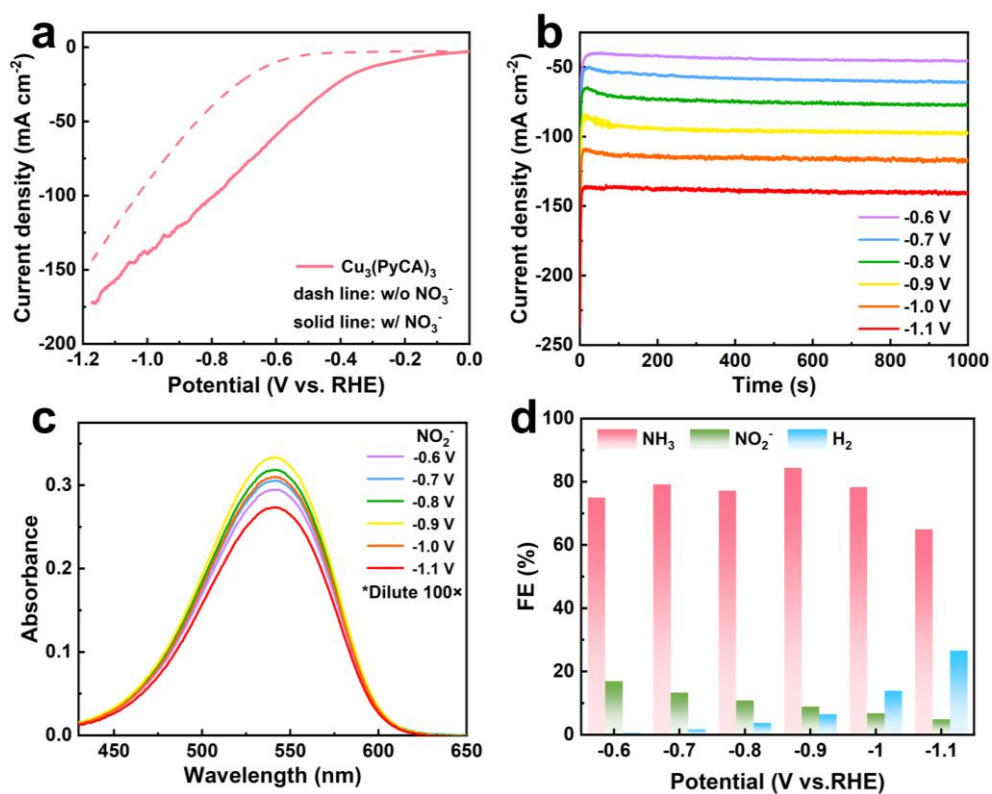

**Figure S49.** LSV curve at a scan rate of  $10 \text{ mV s}^{-1}$  (a) and chronoamperometry curve at different applied potentials (b) of  $\text{Cu}_3(\text{PyCA})_3$  for  $\text{NO}_3\text{RR}$ . UV-vis absorption spectra of  $\text{NO}_2^-$  after chromogenic reaction (c).  $\text{NH}_3$ ,  $\text{NO}_2^-$  and  $\text{H}_2$  FEs of  $\text{Cu}_3(\text{PyCA})_3$  at different applied potentials (d).

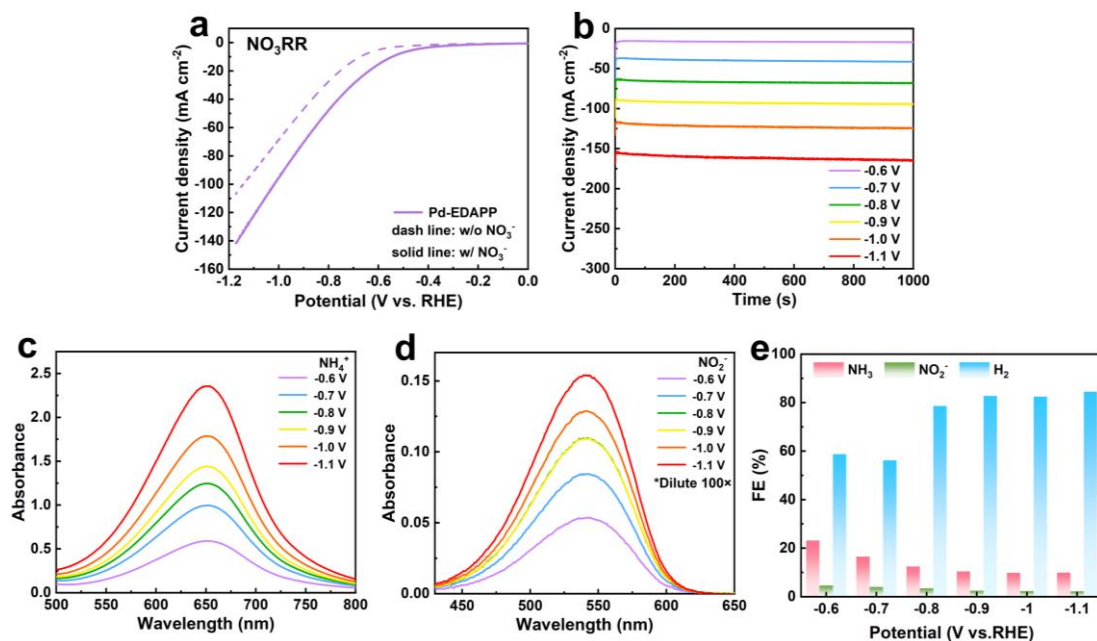

**Figure S50.** LSV curve at a scan rate of  $10 \text{ mV s}^{-1}$  (a) and chronoamperometry curve at different applied potentials (b) of Pd-EDAPP for NO<sub>3</sub>RR. UV-vis absorption spectra of NH<sub>4</sub><sup>+</sup> (c) and NO<sub>2</sub><sup>-</sup> (d) after chromogenic reaction. NH<sub>3</sub>, NO<sub>2</sub><sup>-</sup> and H<sub>2</sub> FEs of Pd-EDAPP at different applied potentials (e).

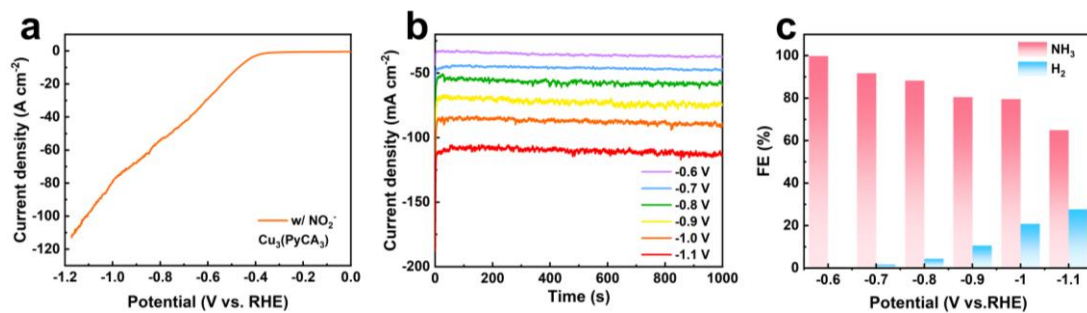

**Figure S51.** LSV curve at a scan rate of  $10 \text{ mV s}^{-1}$  (a) and chronoamperometry curve at different applied potentials (b) of Cu<sub>3</sub>(PyCA)<sub>3</sub> for NO<sub>2</sub>RR. NH<sub>3</sub> and H<sub>2</sub> FEs of Cu<sub>3</sub>(PyCA)<sub>3</sub> at different applied potentials (c).

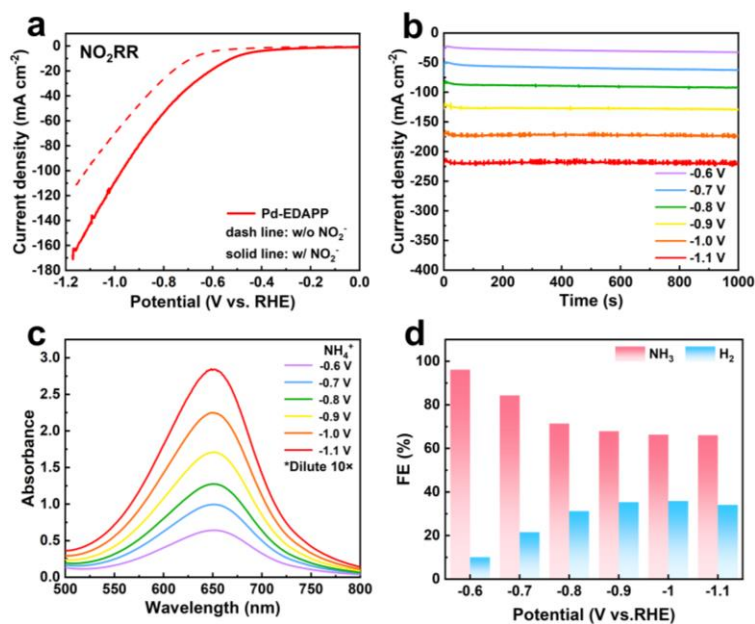

**Figure S52.** LSV curve at a scan rate of  $10 \text{ mV s}^{-1}$  (a) and chronoamperometry curve at different applied potentials (b) of Pd-EDAPP for NO<sub>2</sub>RR. UV-vis absorption spectra of NH<sub>4</sub><sup>+</sup> (c) after chromogenic reaction. NH<sub>3</sub> and H<sub>2</sub> FEs of Pd-EDAPP at different applied potentials (d).

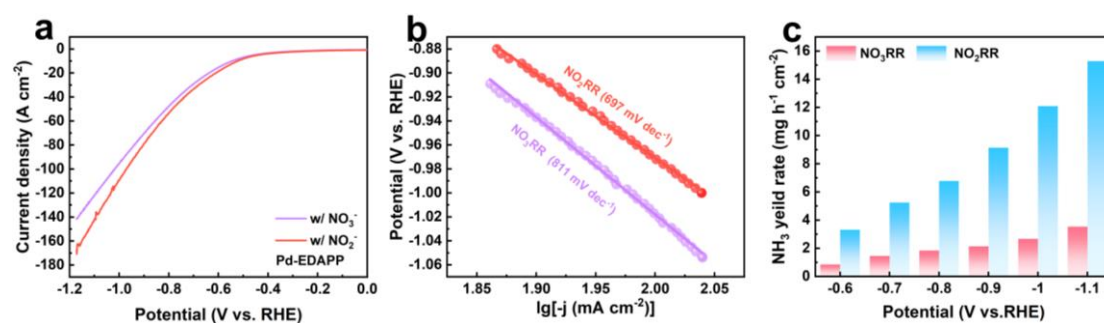

**Figure S53.** LSV curve at a scan rate of  $10 \text{ mV s}^{-1}$  of Pd-EDAPP for NO<sub>2</sub>RR and NO<sub>3</sub>RR (a). The Tafel plots of Pd-EDAPP for NO<sub>2</sub>RR and NO<sub>3</sub>RR (b). The generation rate of NH<sub>3</sub> in Pd-EDAPP-catalyzed NO<sub>3</sub>RR and NO<sub>2</sub>RR at different applied potentials (c).

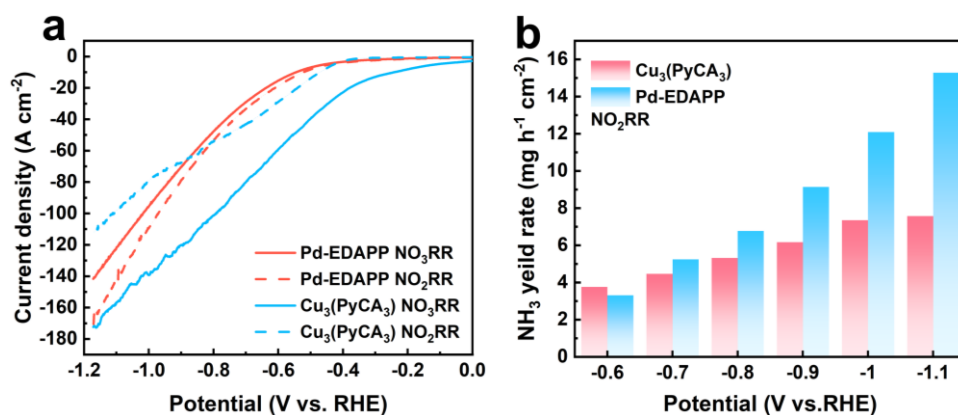

**Figure S54.** LSV curve at a scan rate of 10 mV s<sup>-1</sup> of Pd-EDAPP and Cu<sub>3</sub>(PyCA)<sub>3</sub> for NO<sub>2</sub>RR and NO<sub>3</sub>RR (a). The NH<sub>3</sub> yield rate of Pd-EDAPP and Cu<sub>3</sub>(PyCA)<sub>3</sub> for NO<sub>2</sub>RR at different applied potentials (b).

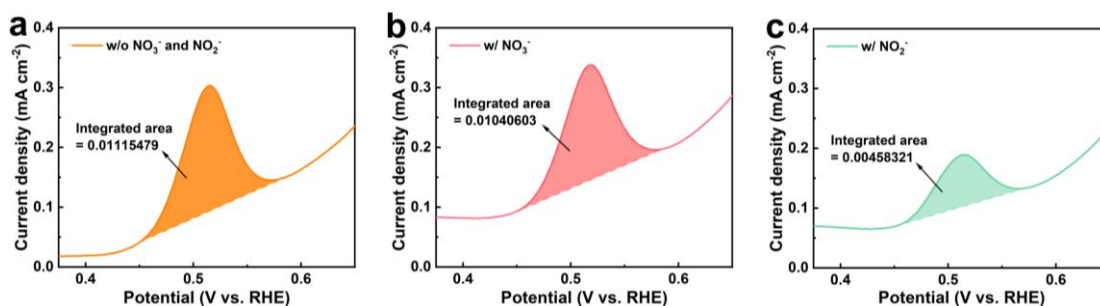

**Figure S55.** The integrated area of <sup>\*</sup>H<sub>ads</sub> from the peak of the CV curves over Pd-EDAPP in 1 M KOH (a) and containing 0.1 M KNO<sub>3</sub> (b) or 0.1 M KNO<sub>2</sub> (c).

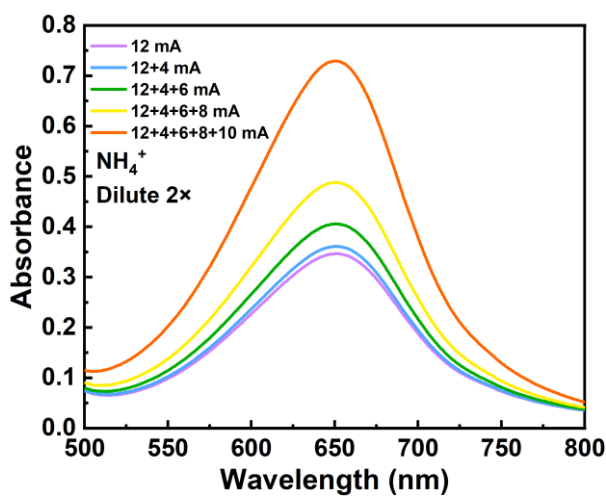

**Figure S56.** UV-vis absorption spectra of NO<sub>2</sub><sup>-</sup> after chromogenic reaction for Zn-NO<sub>3</sub><sup>-</sup> battery.

## References

- [1] F. Lv, M. Sun, Y. Hu, J. Xu, W. Huang, N. Han, B. Huang, Y. Li, *Energy Environ. Sci.*, 2023, **16**, 201-209.
- [2] H. Hu, R. Miao, F. Yang, F. Duan, H. Zhu, Y. Hu, M. Du, S. Lu, *Adv. Energy Mater.*, 2024, **14**, 2302608.
- [3] J. Zhong, H. Duan, M. Cai, Y. Zhu, Z. Wang, X. Li, Z. Zhang, W. Qu, K. Zhang, D. Han, D. Cheng, Y. Shen, M. Xie, E. Cortes, D. Zhang, *Angew. Chem. Int. Ed.*, 2025, **64**, e202507956.
- [4] Y. Zhu, H. Duan, C. Gruder, W. Qu, H. Zhang, Z. Wang, J. Zhong, X. Zhang, L. Han, D. Cheng, A. Medina, E. Cortés, D. Zhang, *Angew. Chem. Int. Ed.*, 2025, **64**, e202421821.
- [5] H. Huang, K. Wang, *Green Chem.*, 2023, **25**, 9167-9174.
- [6] M. Li, B. Han, L. Gong, Y. Jin, M. Wang, X. Ding, D. Qi, J. Jiang, *Chinese Chemical Letters.*, 2026, **37**, 110590.
- [7] S. Mohamed, S. Namvar, T. Zhang, H. Shahbazi, Z. Jiang, A. Rappe, A. Salehi-Khojin, S. Nejati, *Adv. Mater.*, 2024, **36**, 2309302.
- [8] X. Li, S. Xia, S. Yang, X. Yang, S. Zheng, X. Xu, Y. Wang, Q. Xu, Z. Jiang, *Angew. Chem. Int. Ed.*, 2025, **64**, e202507479.
- [9] Z. Zhang, M. Wang, H. Xing, X. Zhou, L. Gao, S. Chen, Y. Chen, H. Xu, W. Li, S. Yuan, C. Li, Z. Jin, J. Zuo, *Angew. Chem. Int. Ed.*, 2025, **64**, e202505580.
- [10] Z. Zhang, Y. Lv, Y. Gu, X. Zhou, B. Tian, A. Zhang, Z. Yang, S. Chen, J. Ma, M. Ding, J. Zuo, *Angew. Chem. Int. Ed.*, 2025, **64**, e202418272.
- [11] L. Xie, Q. Hao, Y. Wu, H. Qin, L. Zheng, K. Liu, *Appl Catal B Environ.*, 2020, **375**, 125428.
- [12] Y. Zou, Y. Yan, Q. Xue, C. Zhang, T. Bao, X. Zhang, L. Yuan, S. Qiao, L. Song, J. Zou, C. Yu, C. Liu, *Angew. Chem. Int. Ed.*, 2024, **63**, e202409799.
- [13] S. Tian, R. Wu, H. Liu, C. Yan, Z. Qi, P. Song, W. Chen, L. Song, Z. Wang, C. Lv, *Angew. Chem. Int. Ed.*, 2025, **64**, e202510665.
- [14] M. Wang, S. Li, Y. Gu, W. Xu, H. Wang, J. Sun, S. Chen, Z. Tie, J. Zuo, J. Ma, J. Su, Z. Jin, *J. Am. Chem. Soc.*, 2024, **146**, 20439-20448.

- [15] M. Wang, Y. Meng, W. Xu, T. Shen, Y. Wang, Q. Yu, C. Liu, Y. Gu, Z. Tie, Z. Fan, J. Zuo, J. Su, Z. Jin, *J. Am. Chem. Soc.*, 2025, **147**, 18327-18337.
- [16] P. Muthukumar, Z. Ullah, X. Zhang, H. Ullah, Y. Liu, L. Li, S. Tian, X. Zhou, S. Anthony, Y. Zuo, C. Lv, X. Wang, C. Wang, *J. Am. Chem. Soc.*, 2025, **147**, 29949-29960.
- [17] P. Liu, J. Yan, H. Huang, W. Song, *Chemical Engineering Journal.*, 2023. **466**, 143134.
- [18] X. Fu, H. Guo, D. Si, H. Zhu, Y. Lan, Y. Huang, R. Cao, *Chem. Sci.*, 2025, **16**, 13503.
- [19] H. Lin, Q. Mo, Y. Wang, C. Chen, L. Zhang, *Inorg. Chem.*, 2025, **64**, 6, 2669–2680.
- [20] X. Li, J. Wang, F. Xue, Y. Wu, H. Xu, T. Yi, Q. Li, *Angew. Chem. Int. Ed.*, 2021, **60**, 2534-2540.
- [21] H. Wang, M. He, R. Li, Y. Liu, Y. Gao, B. Zhang, C. Liu, *Angew. Chem. Int. Ed.*, 2025, e202513463.
